# Supplementary material
Source: PubMed Central journal article supplement (PMC5519408)
Supplement: NIHMS872546-supplement-SuppInfo.pdf [file NIHMS872546-supplement-SuppInfo.pdf]

# Electronic and Steric Optimization of Fluorogenic Probes for Biomolecular Imaging

Wen Chyan,<sup>†</sup> Henry R. Kilgore,<sup>‡</sup> Brian Gold,<sup>†</sup> and Ronald T. Raines<sup>\*,†,§</sup>

<sup>†</sup>Department of Chemistry, <sup>‡</sup>Graduate Program in Biophysics, and <sup>§</sup>Department of Biochemistry, University of Wisconsin–Madison, Madison, Wisconsin 53706, United States

\*rtraines@wisc.edu

---

| Content                                                                                                                                                                          | Page |
|----------------------------------------------------------------------------------------------------------------------------------------------------------------------------------|------|
| Table of Contents                                                                                                                                                                | S1   |
| <b>Table S1.</b> Apparent steady-state kinetic parameters for the enzymatic unmasking of fluorogenic probes.                                                                     | S2   |
| <b>Figure S1.</b> 3D Rendering of the 2D potential-energy surface for 2-chlorophenyl acetate ( <b>2c</b> ) in Figure 3C.                                                         | S3   |
| <b>Figure S2.</b> Graphs showing the time-course for the hydrolysis of probes <b>1a</b> , <b>1c</b> , <b>3a–g</b> , and <b>AM</b> as measured by the generation of fluorescence. | S4   |
| <b>Figure S3.</b> Kinetic traces and Michaelis–Menten plots for the unmasking of fluorogenic probes.                                                                             | S5   |
| <b>Figure S4.</b> Rate of fluorophore photobleaching in live HeLa cells under continuous illumination.                                                                           | S6   |
| References                                                                                                                                                                       | S6   |
| NMR Spectra                                                                                                                                                                      | S7   |
| IR Spectra                                                                                                                                                                       | S22  |
| Dihedral-Angle Scans                                                                                                                                                             | S27  |
| Cartesian Coordinates and Calculated Energies                                                                                                                                    | S37  |

---

**Table S1.** Kinetic parameters were obtained by fitting Michaelis–Menten plots generated from the initial rates of probe-unmasking in 10 mM HEPES–NaOH buffer, pH 7.3, containing PLE (Figure S3).

| Fluorophore (Probe)                                  | Number of Masking Groups | Auto-immolative Linker | $k_{\text{cat}}/K_M$ ( $\text{M}^{-1}\text{s}^{-1}$ ) | $K_M$ ( $\mu\text{M}$ ) |
|------------------------------------------------------|--------------------------|------------------------|-------------------------------------------------------|-------------------------|
| fluorescein ( <b>1a</b> ) <sup>5</sup>               | 2                        | —                      | $1.4 \times 10^6$                                     | 11                      |
| 2',7'-difluorofluorescein ( <b>1b</b> ) <sup>5</sup> | 2                        | —                      | $2.9 \times 10^5$                                     | 5.3                     |
| 2',7'-dichlorofluorescein ( <b>1c</b> )              | 2                        | —                      | $2.8 \times 10^6$                                     | 1.8                     |
| fluorescein <sup>5</sup>                             | 2                        | AM ether               | $6.8 \times 10^5$                                     | 3.2                     |
| 2',7'-difluorofluorescein <sup>5</sup>               | 2                        | AM ether               | $3.8 \times 10^5$                                     | 4.9                     |
| 2',7'-dichlorofluorescein (AM)                       | 2                        | AM ether               | $8.4 \times 10^5$                                     | 2.2                     |
| 2',7'-dichlorofluorescein ( <b>3b</b> )              | 2                        | —                      | $1.8 \times 10^6$                                     | 4.6                     |
| morpholino-urea-rhodamine <sup>6</sup>               | 1                        | trimethyl lock         | $8.2 \times 10^5$                                     | 0.10                    |

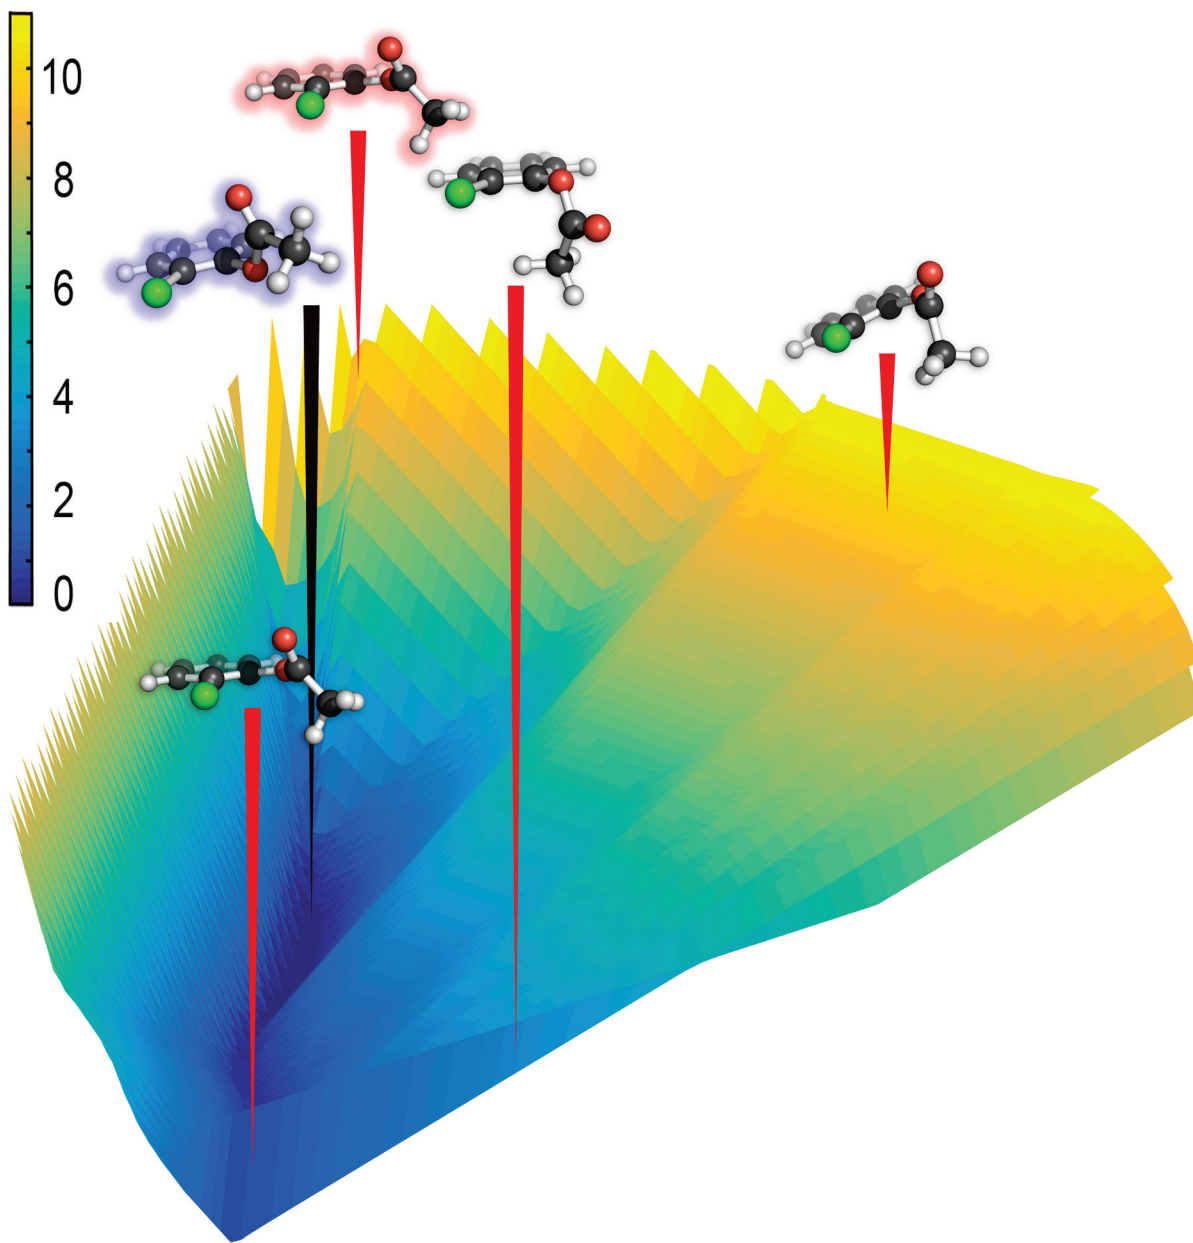

**Figure S1.** 3D Rendering of the 2D potential-energy surface for 2-chlorophenyl acetate (**2c**) in Figure 3C. Lowest energy conformations (blue) correspond to regions with favorable  $n \rightarrow \pi^*$  interactions and the ester in a *syn* conformation. Highest energy conformations (yellow) are caused by unfavorable  $n(\pi)$  Pauli repulsion and rotational barriers. Although the *anti* conformation is not preferred, when 2-chlorophenyl acetate adopts a conformation with an  $n \rightarrow \pi^*$  interaction of the same strength as the *syn* conformation, the  $\Delta E$  between the *syn* and *anti* conformations is only 2.66 kcal/mol. Reducing the distance  $d$  and angle  $\theta$  leads to the highest energy conformation (red highlight) with a maximum difference of 11.77 kcal/mol at  $d = 2.92 \text{ \AA}$  and  $\theta = 93.5^\circ$ , as the carbonyl carbon enters the plane of the phenyl ring.

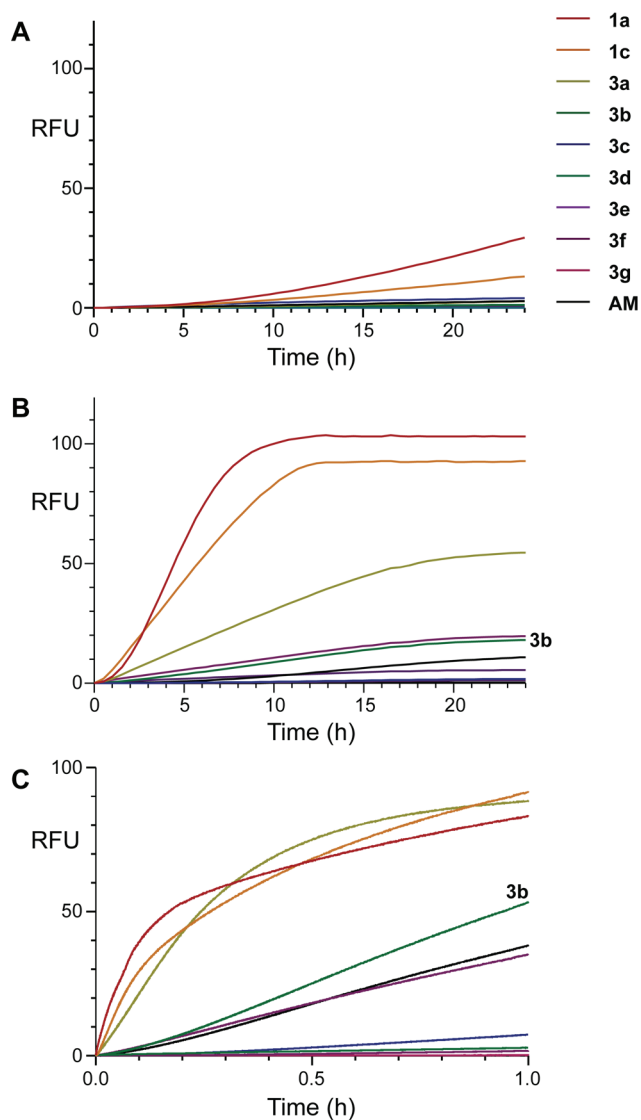

**Figure S2.** Graphs showing the time-course for the hydrolysis of probes **1a**, **1c**, **3a-g**, and **AM** as measured by the generation of fluorescence. Probe concentrations were 5  $\mu$ M. (A) Spontaneous hydrolysis in 10 mM HEPES-NaOH buffer, pH 7.3. (B) Spontaneous hydrolysis in OptiMEM containing FBS (10% v/v). (C) Enzyme-catalyzed hydrolysis in 10 mM HEPES-NaOH buffer, pH 7.3, containing PLE (50 ng/mL). RFU: relative fluorescence units.

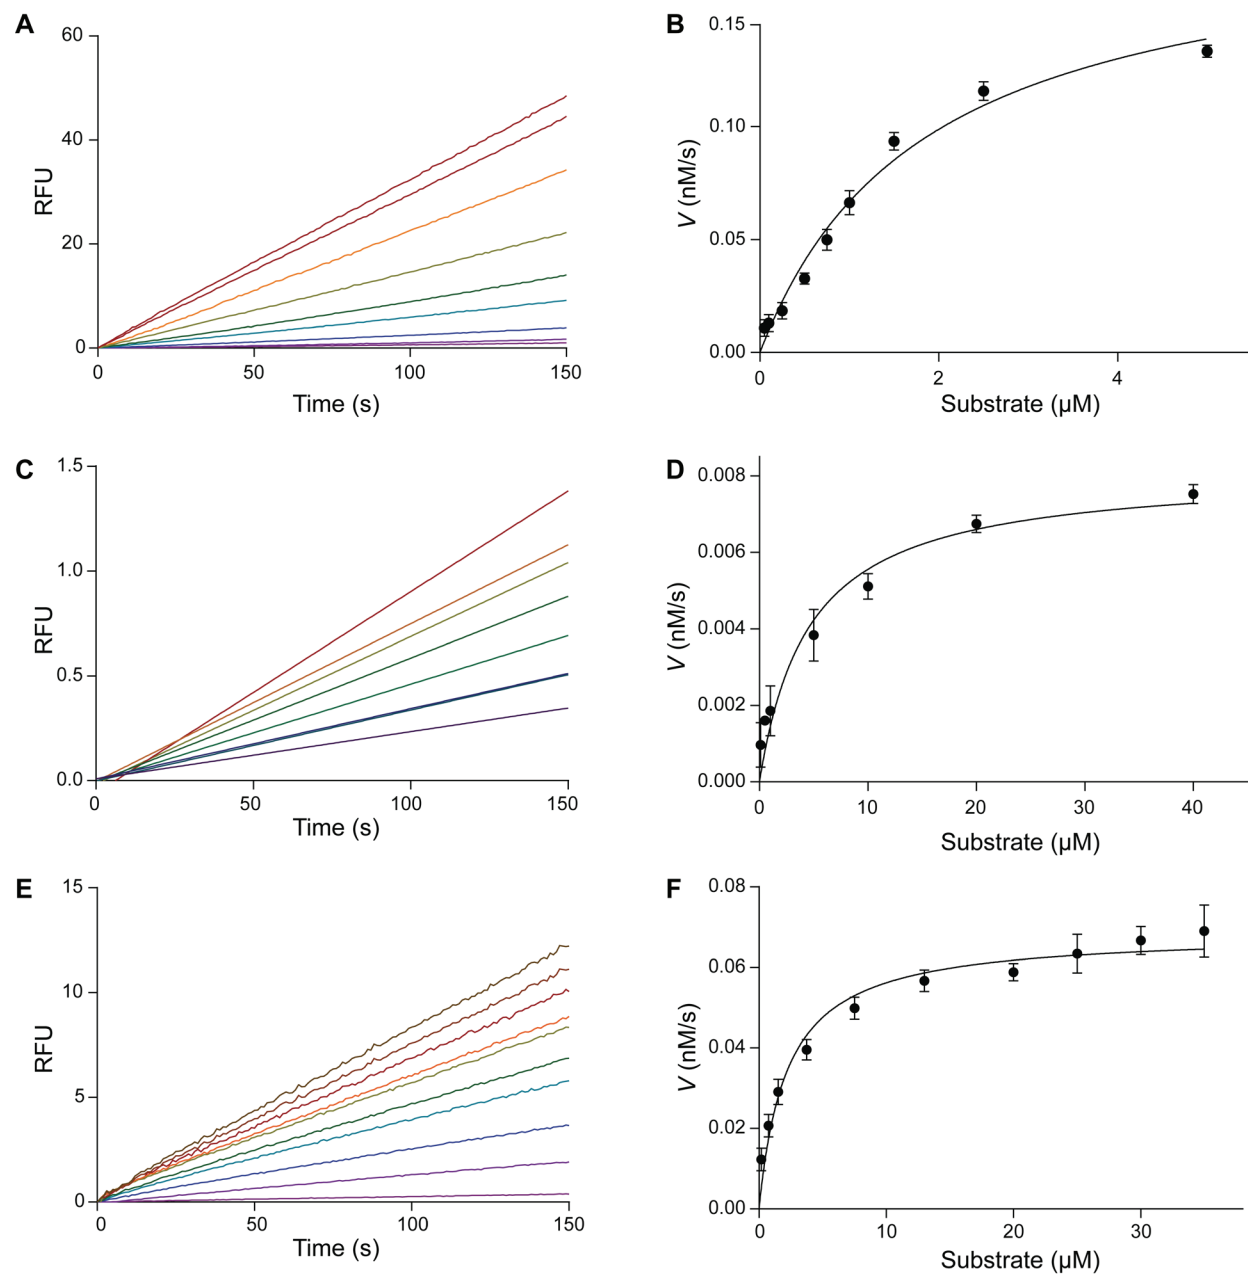

**Figure S3.** Kinetic traces and Michaelis–Menten plots for the unmasking of fluorogenic probes. Assays were performed in 10 mM HEPES–NaOH buffer, pH 7.3, containing PLE (9 ng/mL). Substrate was added at  $t = -60$  s, and enzyme was added at  $t = 0$ . (A, B) Probe **1c**;  $k_{\text{cat}}/K_{\text{M}} = 2.8 \times 10^6 \text{ M}^{-1}\text{s}^{-1}$  and  $K_{\text{M}} = 1.8 \text{ }\mu\text{M}$ . (C, D) Probe **3b**;  $k_{\text{cat}}/K_{\text{M}} = 1.8 \times 10^6 \text{ M}^{-1}\text{s}^{-1}$  and  $K_{\text{M}} = 4.6 \text{ }\mu\text{M}$ . (E, F) **AM**;  $k_{\text{cat}}/K_{\text{M}} = 8.4 \times 10^5 \text{ M}^{-1}\text{s}^{-1}$  and  $K_{\text{M}} = 2.2 \text{ }\mu\text{M}$ .

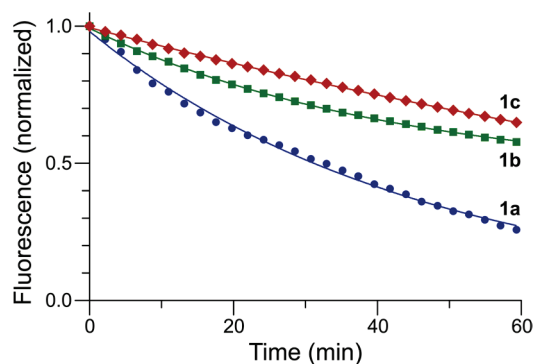

**Figure S4.** Rate of fluorophore photobleaching in live HeLa cells under continuous illumination. Cells were incubated with **1a**, **1b**, or **1c** (4  $\mu$ M) for 15 min, washed twice, and images were acquired at 2-min intervals with continuous illumination between measurements. 2',7'-Dichlorofluorescein (which is unmasked **1c**) had significantly greater resistance to photobleaching than did either fluorescein (unmasked **1a**) or difluorofluorescein (unmasked **1b**).

## References

- (1) Critchfield, F. E.; Gibson, J. A.; Hall, J. L. *J. Am. Chem. Soc.* **1953**, *75*, 1991–1992.
- (2) French, A. P.; Mills, S.; Swarup, R.; Bennett, M. J.; Pridmore, T. P. *Nat. Protoc.* **2008**, *3*, 619–628.
- (3) Frisch, M. J.; Trucks, G. W.; Schlegel, H. B.; Scuseria, G. E.; Robb, M. A.; Cheeseman, J. R.; Scalmani, G.; Barone, V.; Mennucci, B.; Petersson, G. A.; Nakatsuji, H.; Caricato, M.; Li, X.; Hratchian, H. P.; Izmaylov, A. F.; Bloino, J.; Zheng, G.; Sonnenberg, J. L.; Hada, M.; Ehara, M.; Toyota, K.; Fukuda, R.; Hasegawa, J.; Ishida, M.; Nakajima, T.; Honda, Y.; Kitao, O.; Nakai, H.; Vreven, T.; Montgomery, J. A., Jr.; Peralta, J. E.; Ogliaro, F.; Bearpark, M.; Heyd, J. J.; Brothers, E.; Kudin, K. N.; Staroverov, V. N.; Kobayashi, R.; Normand, J.; Raghavachari, K.; Rendell, A.; Burant, J. C.; Iyengar, S. S.; Tomasi, J.; Cossi, M.; Rega, N.; Millam, J. M.; Klene, M.; Knox, J. E.; Cross, J. B.; Bakken, V.; Adamo, C.; Jaramillo, J.; Gomperts, R.; Stratmann, R. E.; Yazyev, O.; Austin, A. J.; Cammi, R.; Pomelli, C.; Ochterski, J. W.; Martin, R. L.; Morokuma, K.; Zakrzewski, V. G.; Voth, G. A.; Salvador, P.; Dannenberg, J. J.; Dapprich, S.; Daniels, A. D.; Farkas, Ö.; Foresman, J. B.; Ortiz, J. V.; Cioslowski, J.; Fox, D. J. *Gaussian 09, Revision D.01*, Gaussian, Inc.: Wallingford, CT, 2009.
- (4) Glendening, E. D.; Badenhop, J. K.; Reed, A. E.; Carpenter, J. E.; Bohmann, J. A.; Morales, C. M.; Weinhold, F. *NBO 6.0*, Madison, WI, 2012.
- (5) Lavis, L. D.; Chao, T.-Y.; Raines, R. T. *Chem. Sci.* **2011**, *2*, 521–530.
- (6) Lavis, L. D.; Chao, T.-Y.; Raines, R. T. *ACS Chem. Biol.* **2006**, *1*, 252–260.

# NMR Spectra

$^1\text{H}$  NMR ( $(\text{CD}_3)_2\text{SO}$ ) and  $^{13}\text{C}$  NMR ( $(\text{CD}_3)_2\text{SO}$ ) Spectra of 2',7'-Dichlorofluorescein

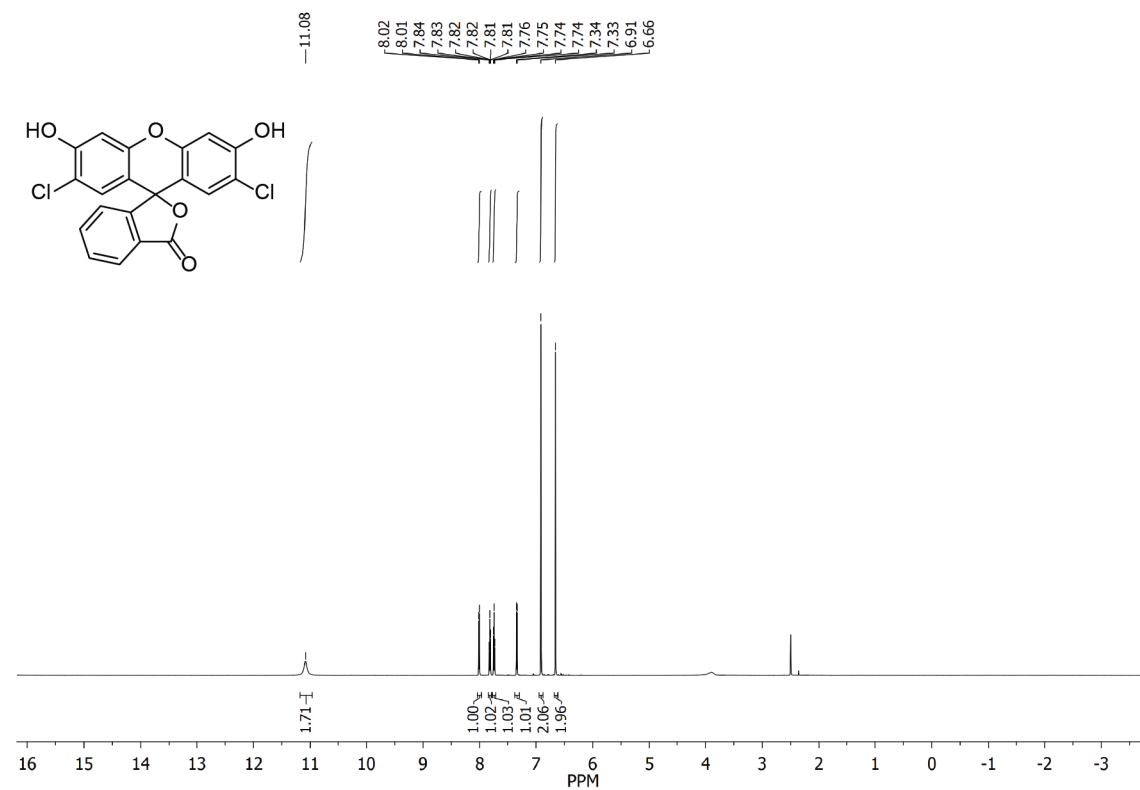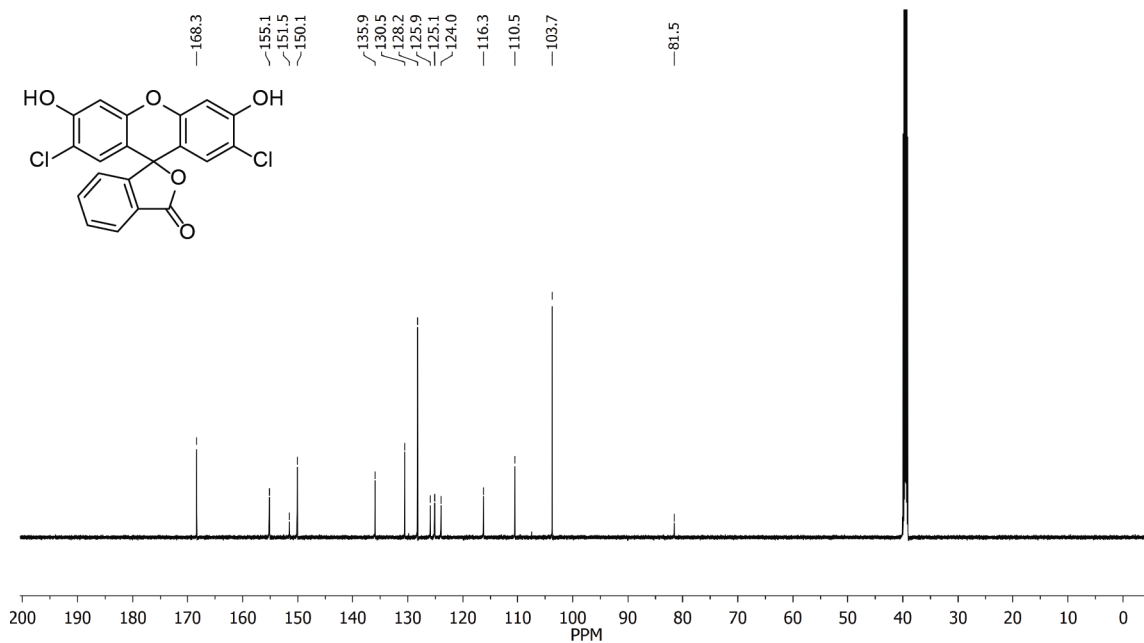

$^1\text{H}$  NMR ( $\text{CDCl}_3$ ) and  $^{13}\text{C}$  NMR ( $\text{CDCl}_3$ ) Spectra of Compound **1c**

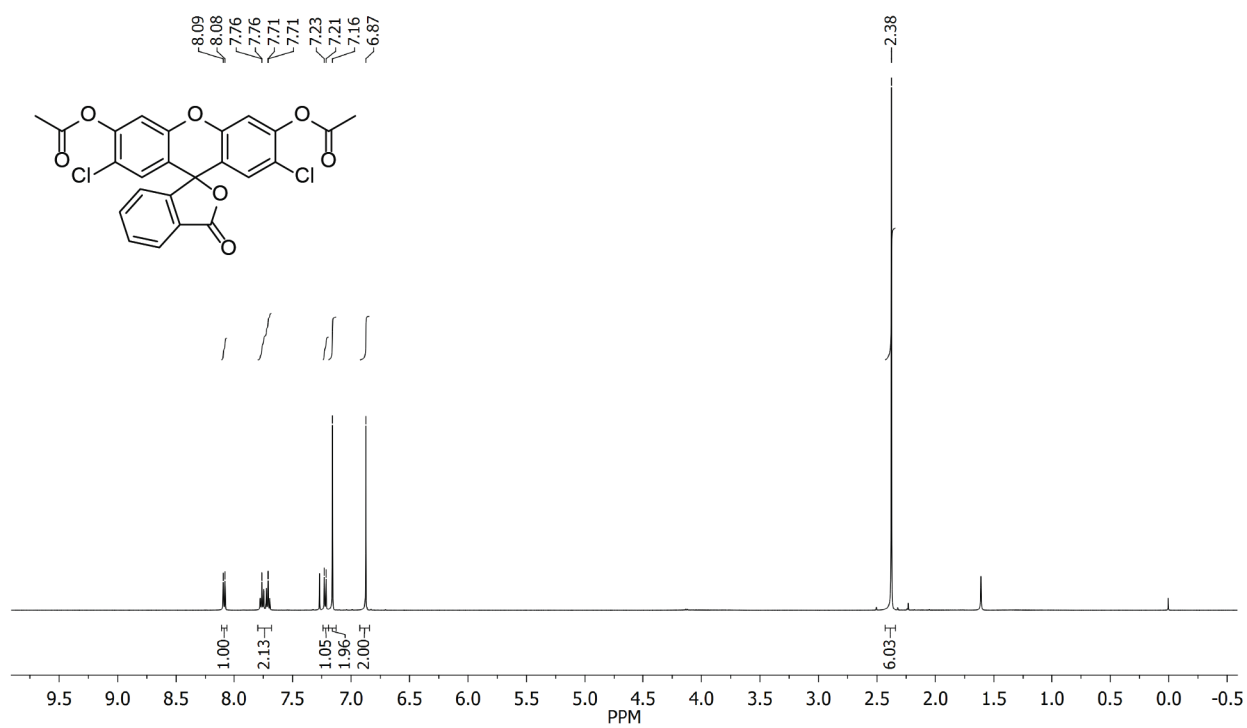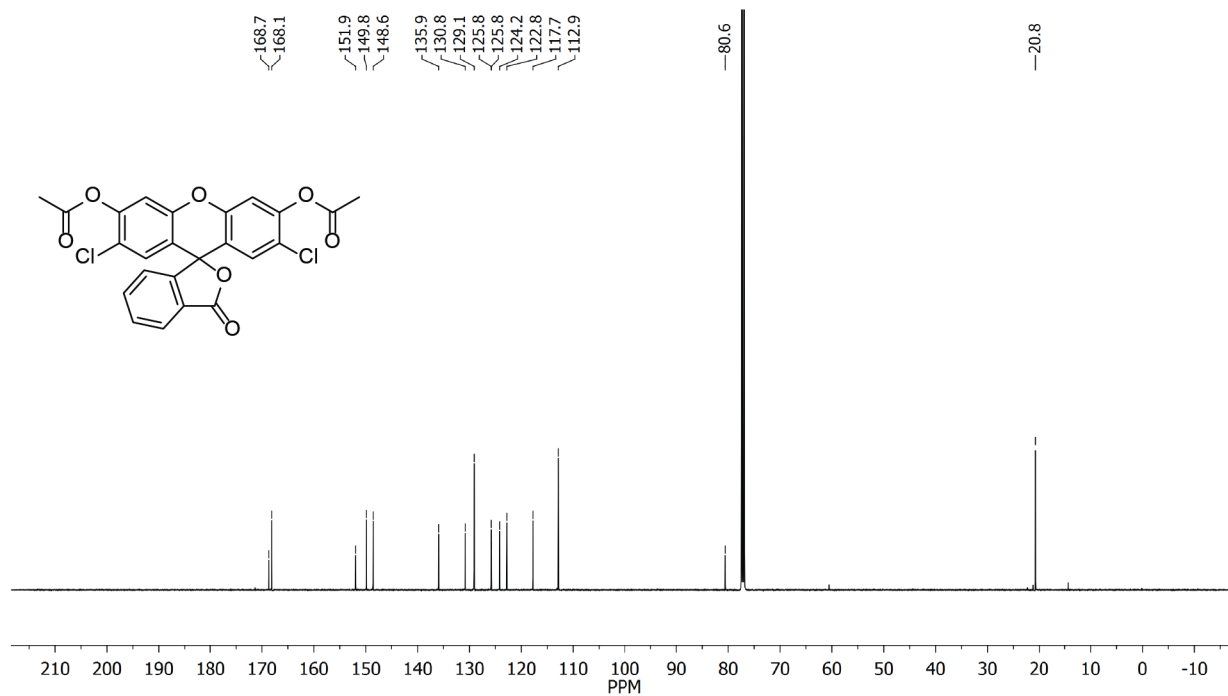



$^1\text{H}$  NMR ( $\text{CDCl}_3$ ) and  $^{13}\text{C}$  NMR ( $\text{CDCl}_3$ ) Spectra of Compound **1d**

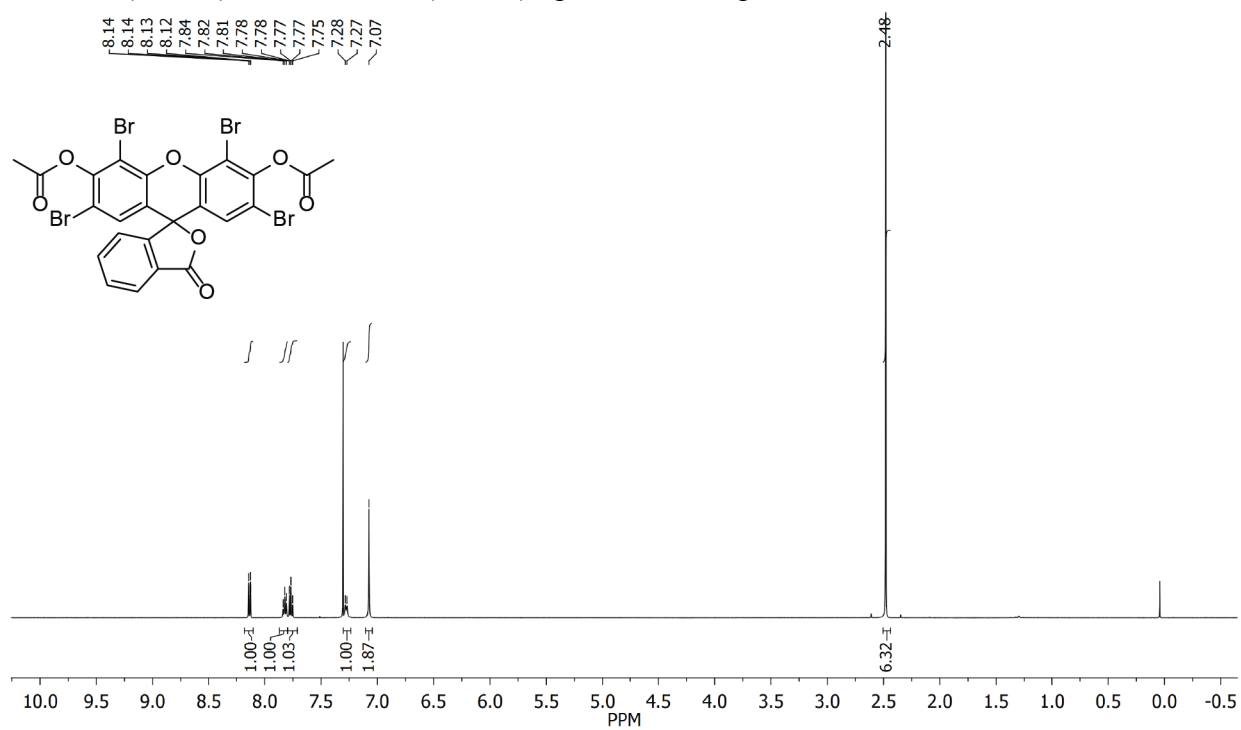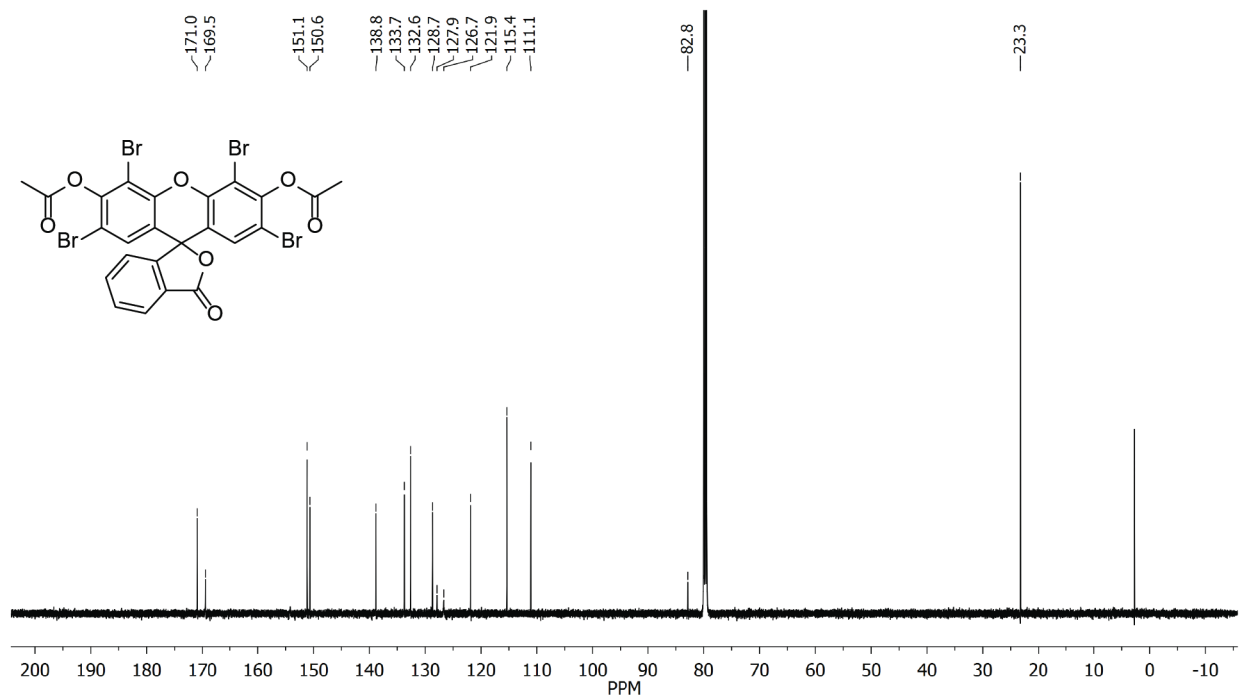

$^1\text{H}$  NMR ( $\text{CDCl}_3$ ) and  $^{13}\text{C}$  NMR ( $\text{CDCl}_3$ ) Spectra of Compound **1e**

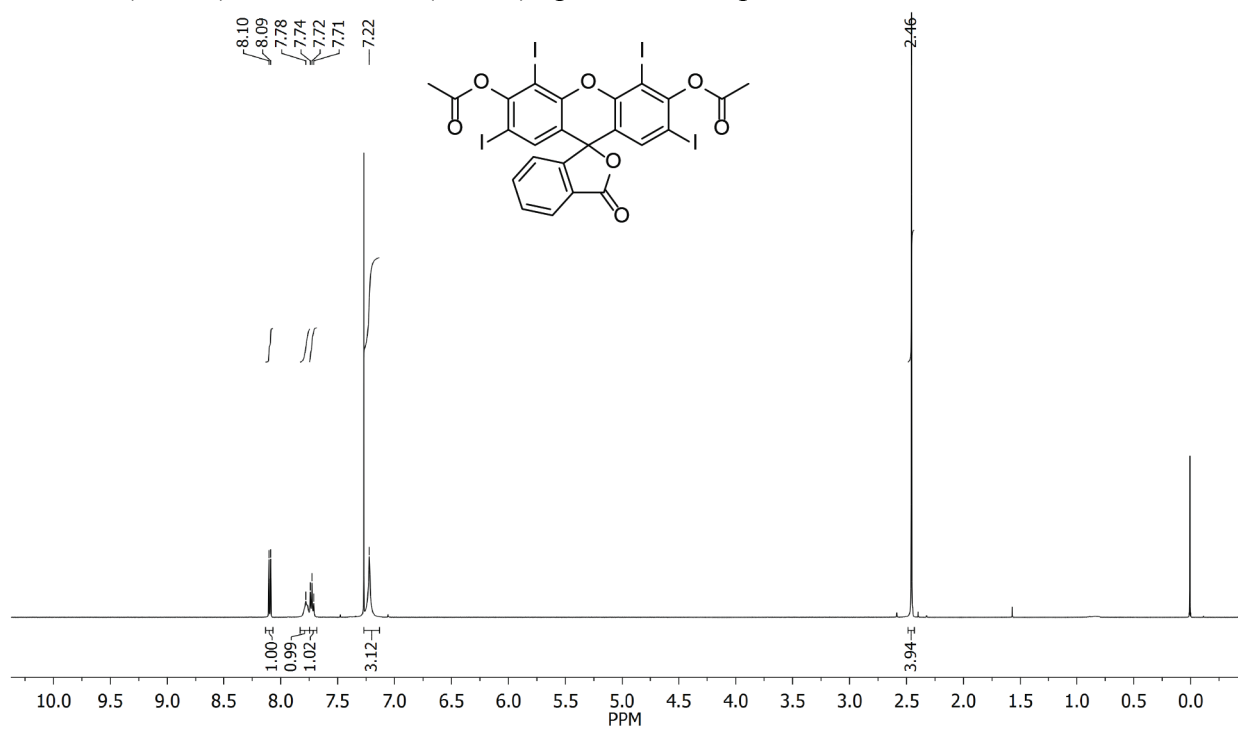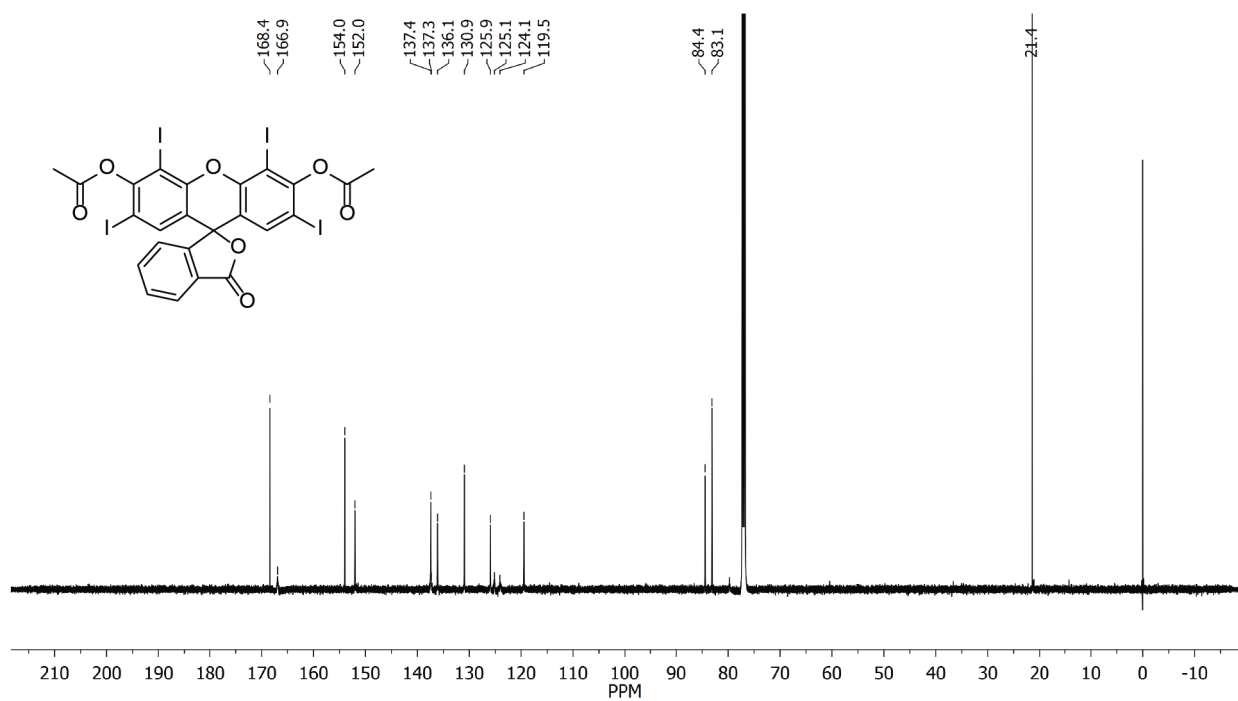

$^1\text{H}$  NMR ( $\text{CDCl}_3$ ) and  $^{13}\text{C}$  NMR ( $\text{CDCl}_3$ ) Spectra of Compound **2b**

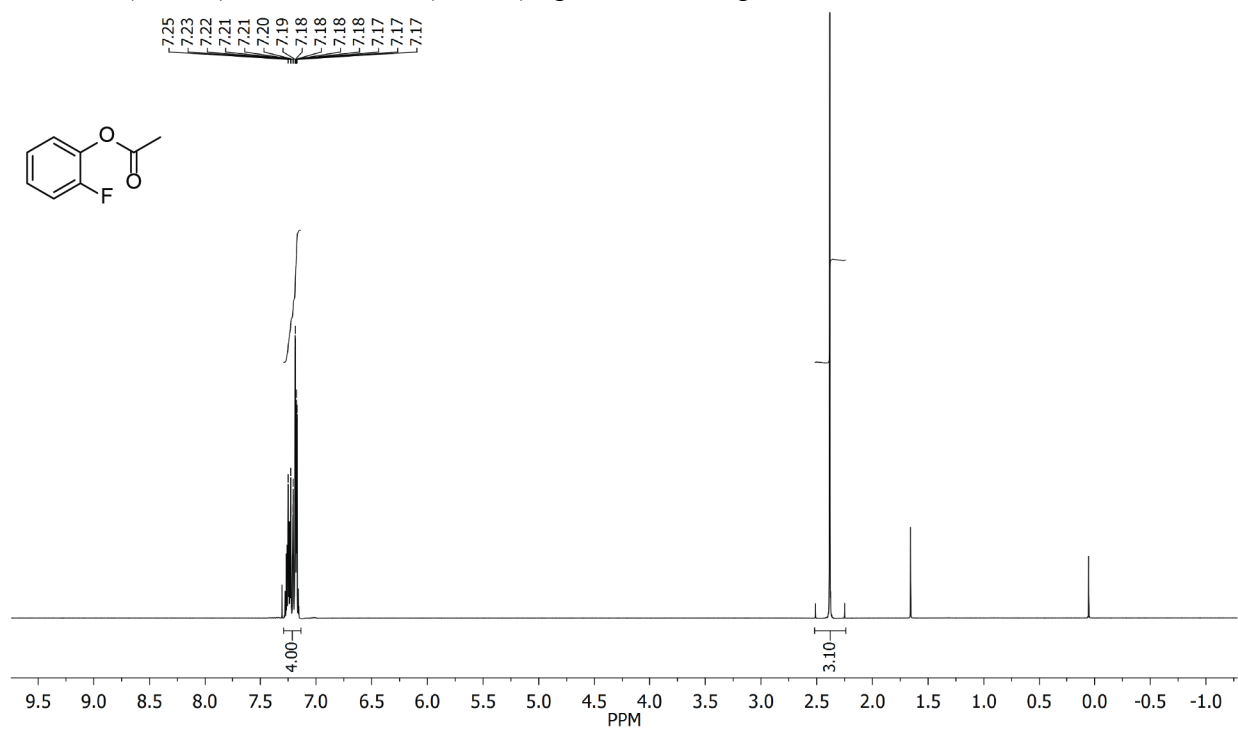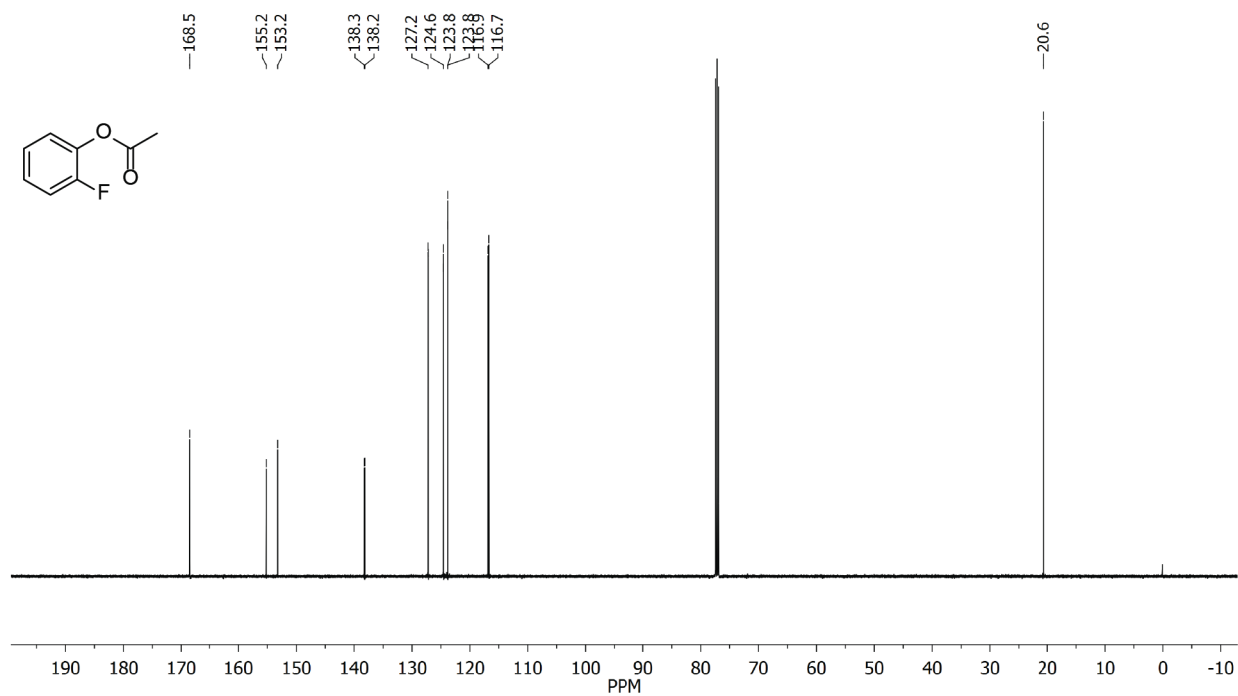

$^1\text{H}$  NMR ( $\text{CDCl}_3$ ) and  $^{13}\text{C}$  NMR ( $\text{CDCl}_3$ ) Spectra of Compound **2c**

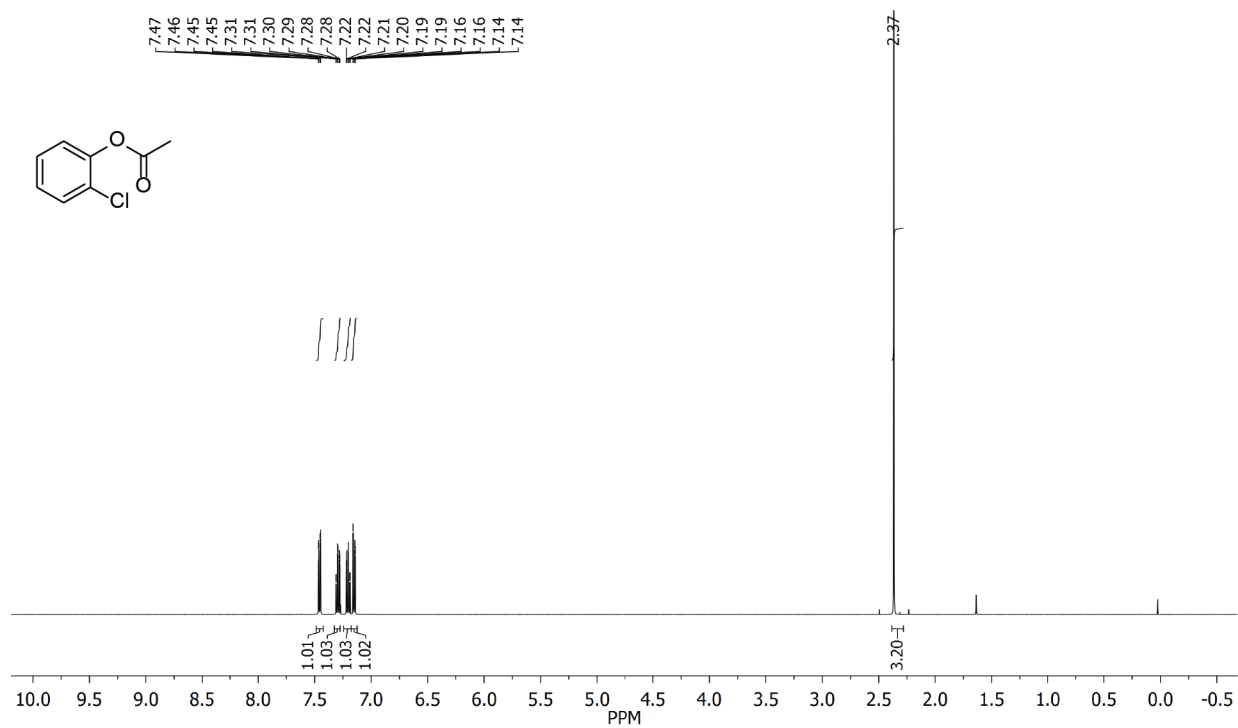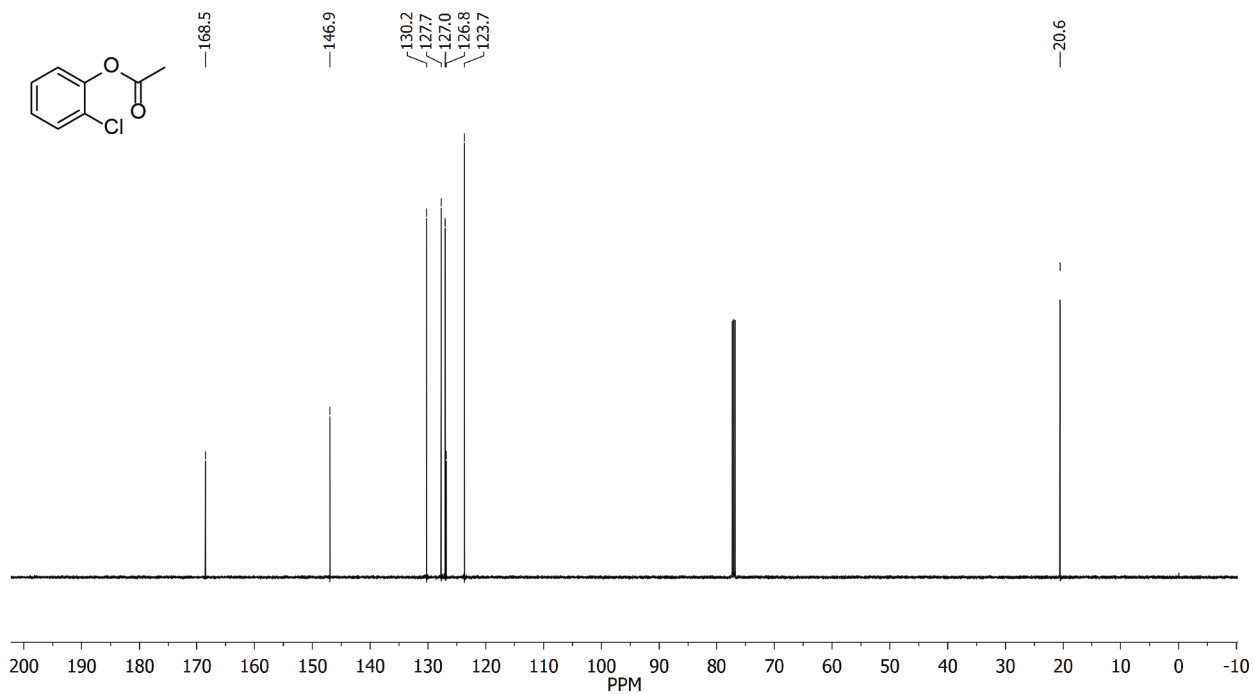

$^1\text{H}$  NMR ( $\text{CDCl}_3$ ) and  $^{13}\text{C}$  NMR ( $\text{CDCl}_3$ ) Spectra of Compound **2d**

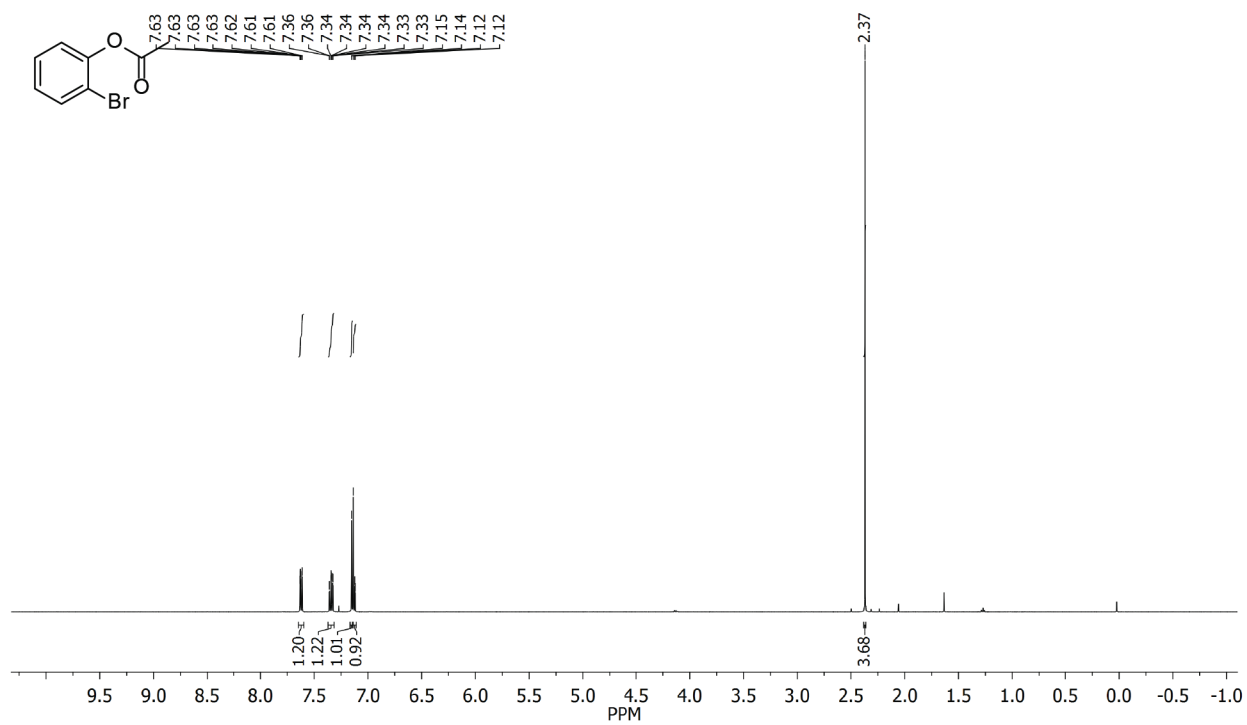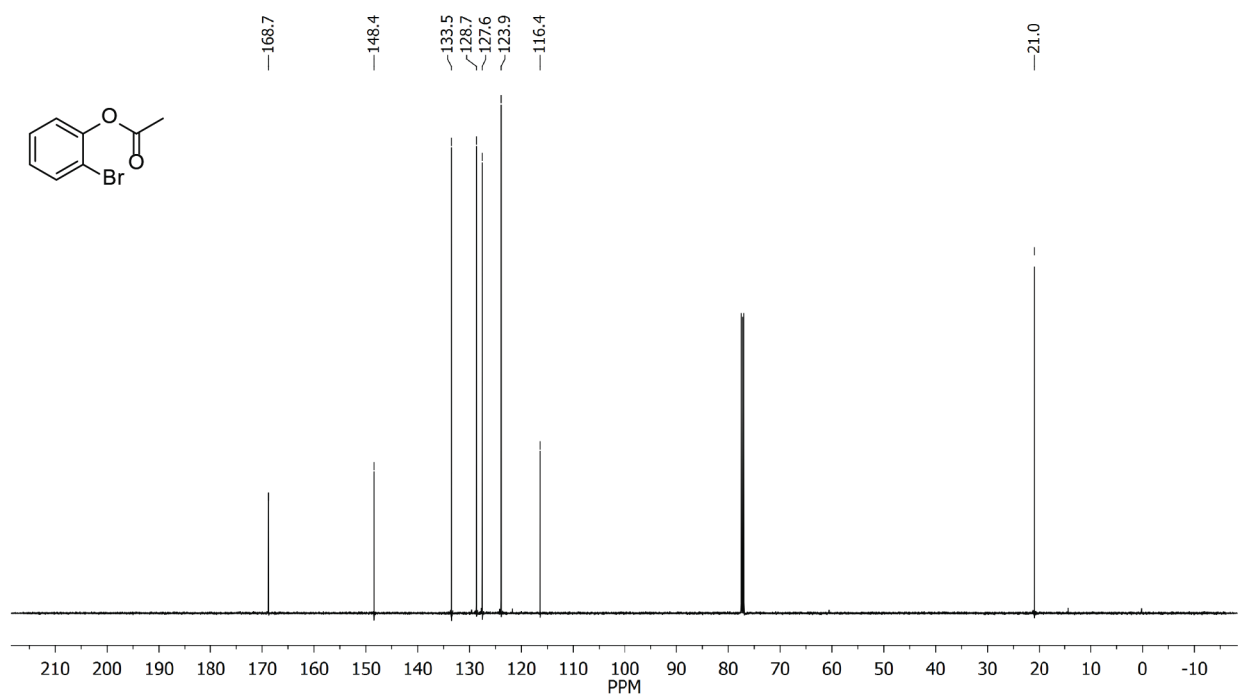

<sup>1</sup>H NMR (CDCl<sub>3</sub>) and <sup>13</sup>C NMR (CDCl<sub>3</sub>) Spectra of Compound **3a**

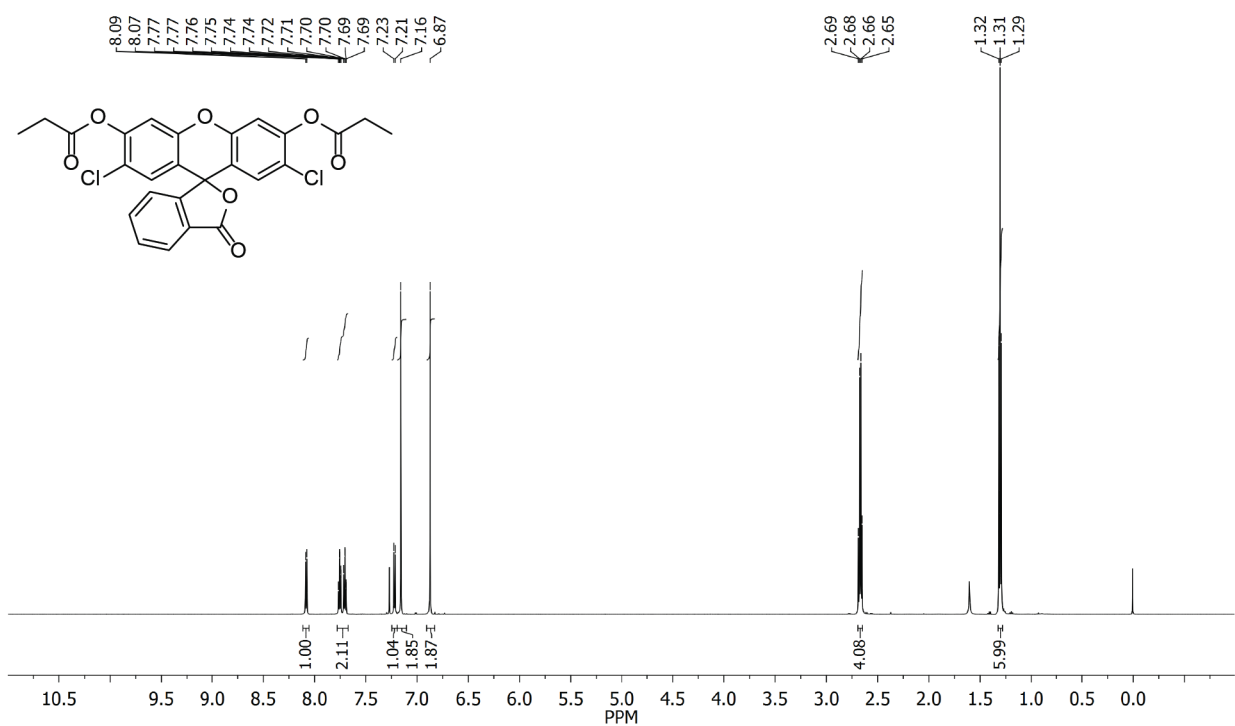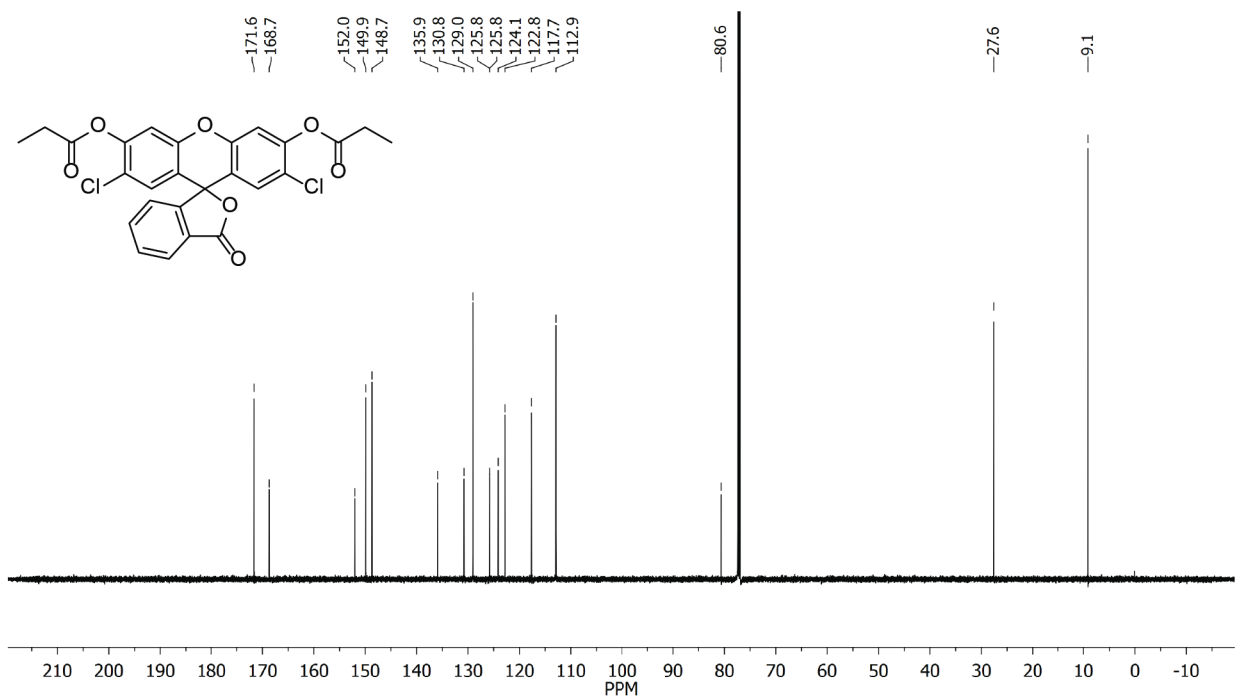

$^1\text{H}$  NMR ( $\text{CDCl}_3$ ) and  $^{13}\text{C}$  NMR ( $\text{CDCl}_3$ ) Spectra of Compound **3b**

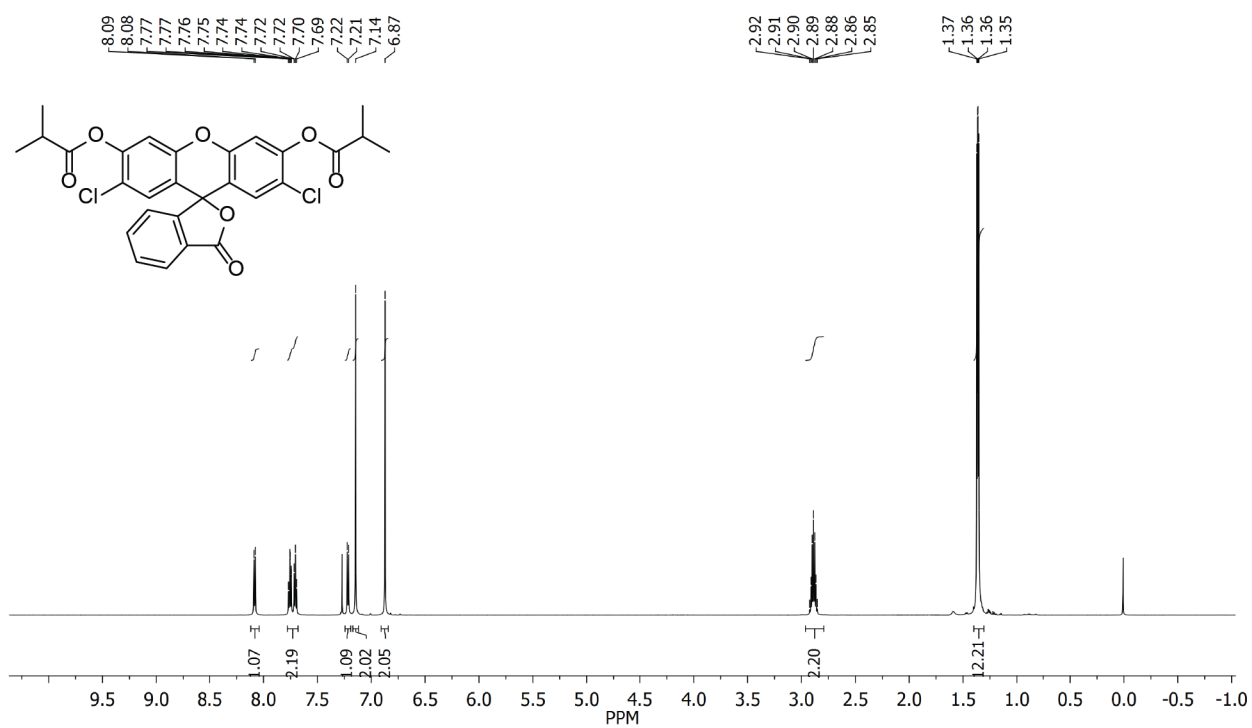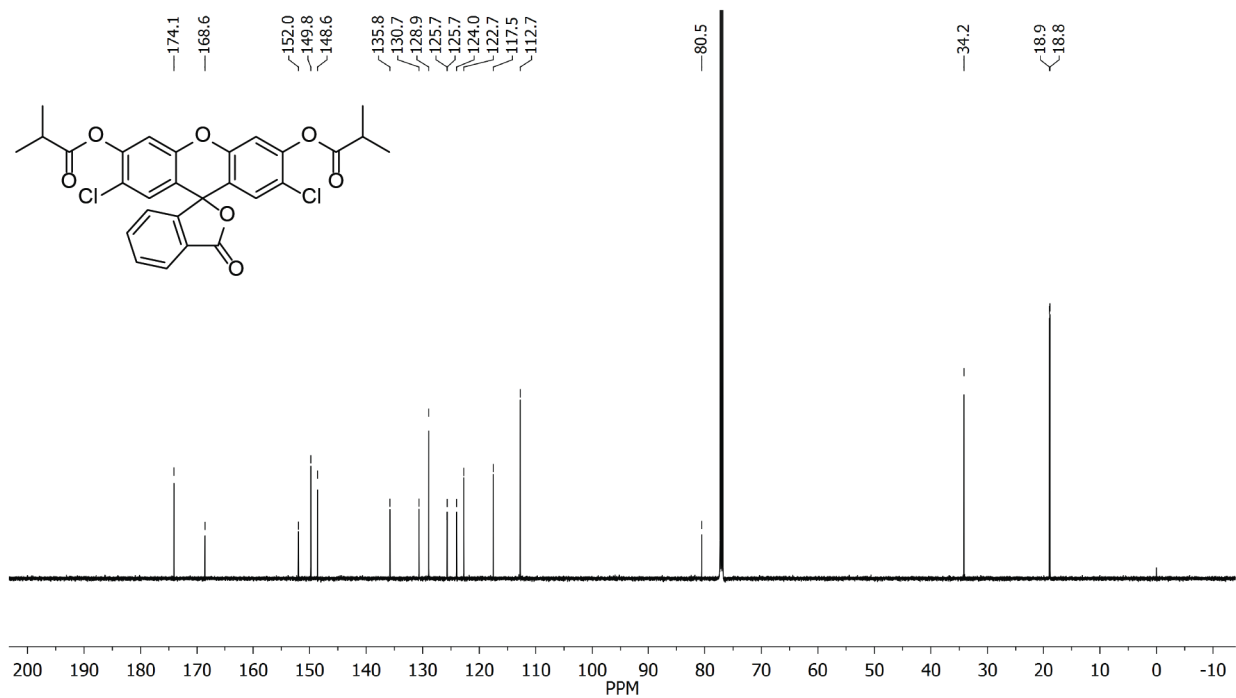

$^1\text{H}$  NMR ( $\text{CDCl}_3$ ) and  $^{13}\text{C}$  NMR ( $\text{CDCl}_3$ ) Spectra of Compound **3c**

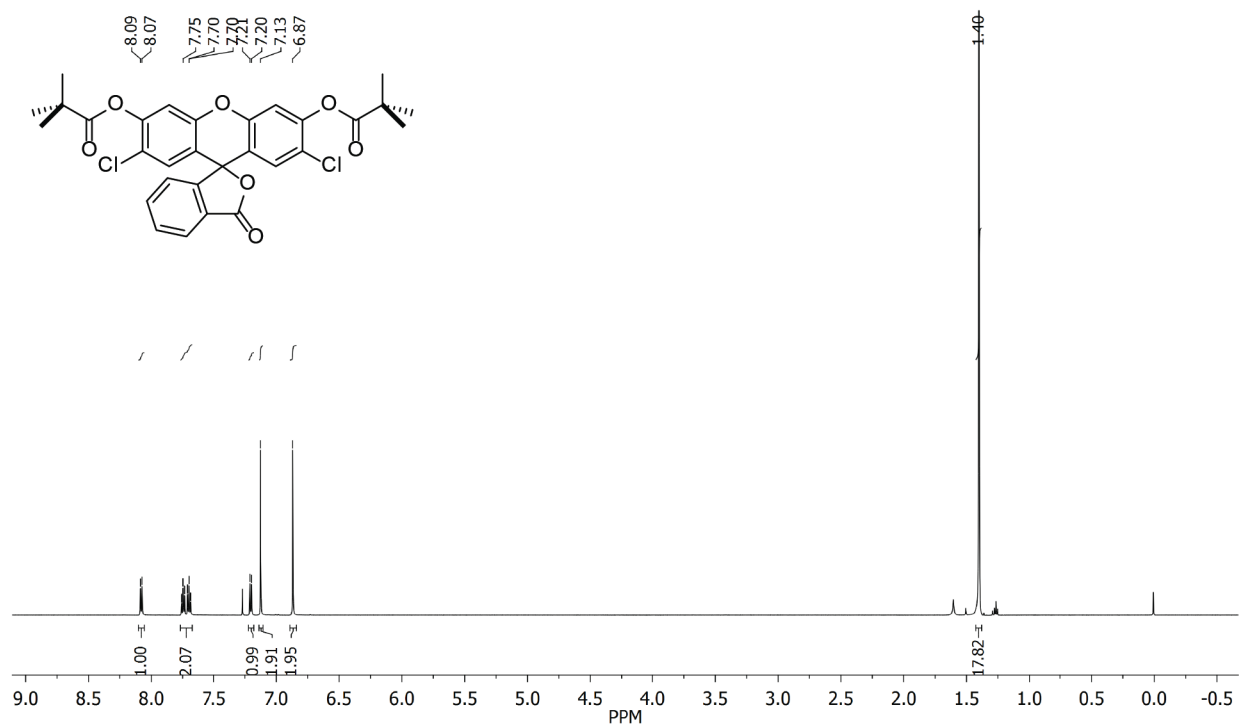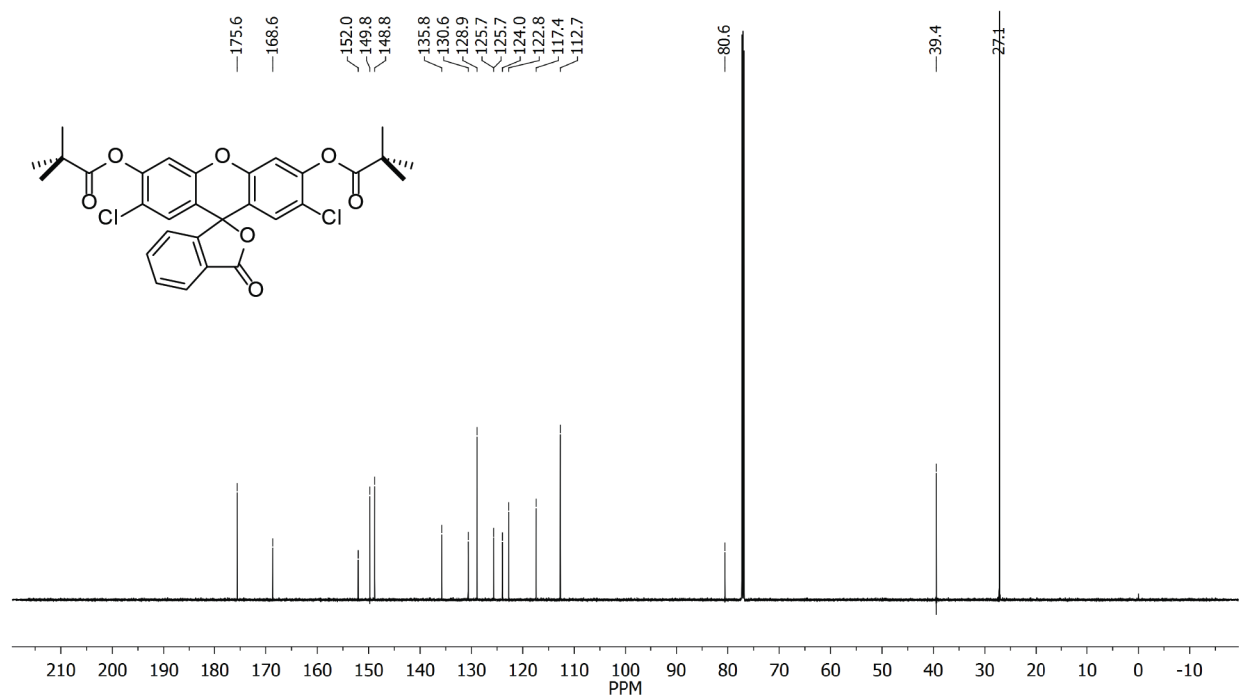



$^1\text{H}$  NMR ( $\text{CDCl}_3$ ) and  $^{13}\text{C}$  NMR ( $\text{CDCl}_3$ ) Spectra of Compound **3d**

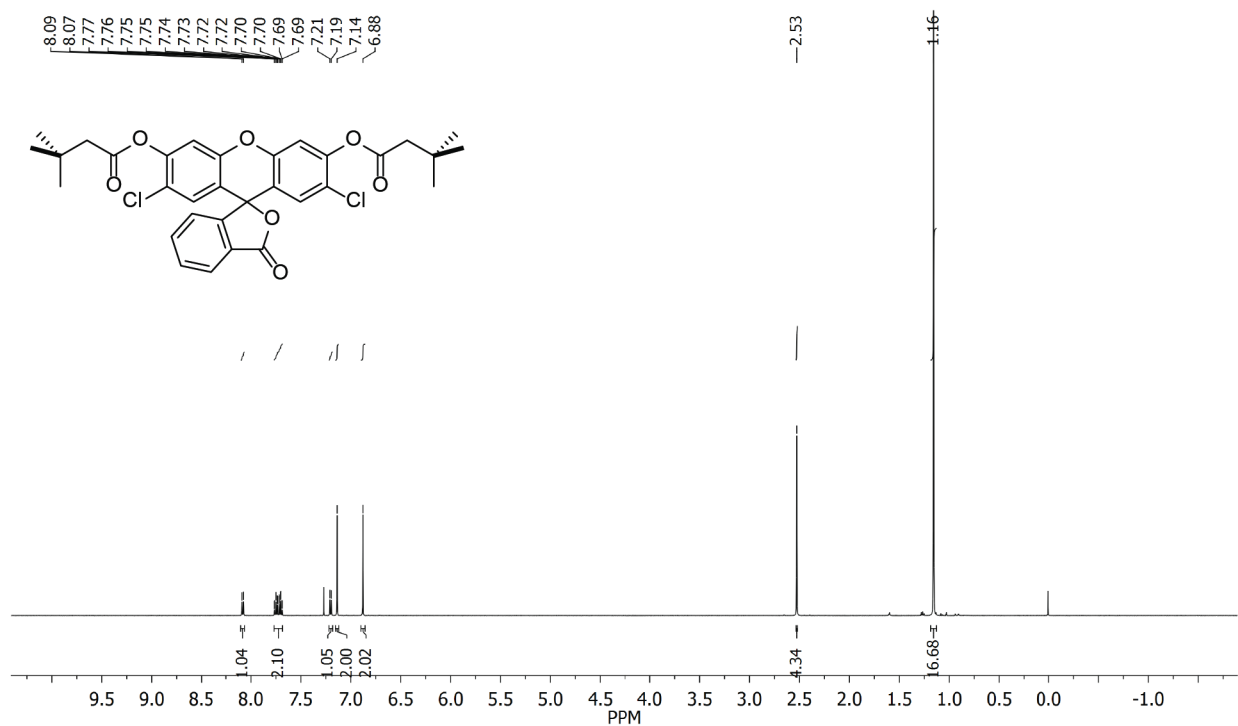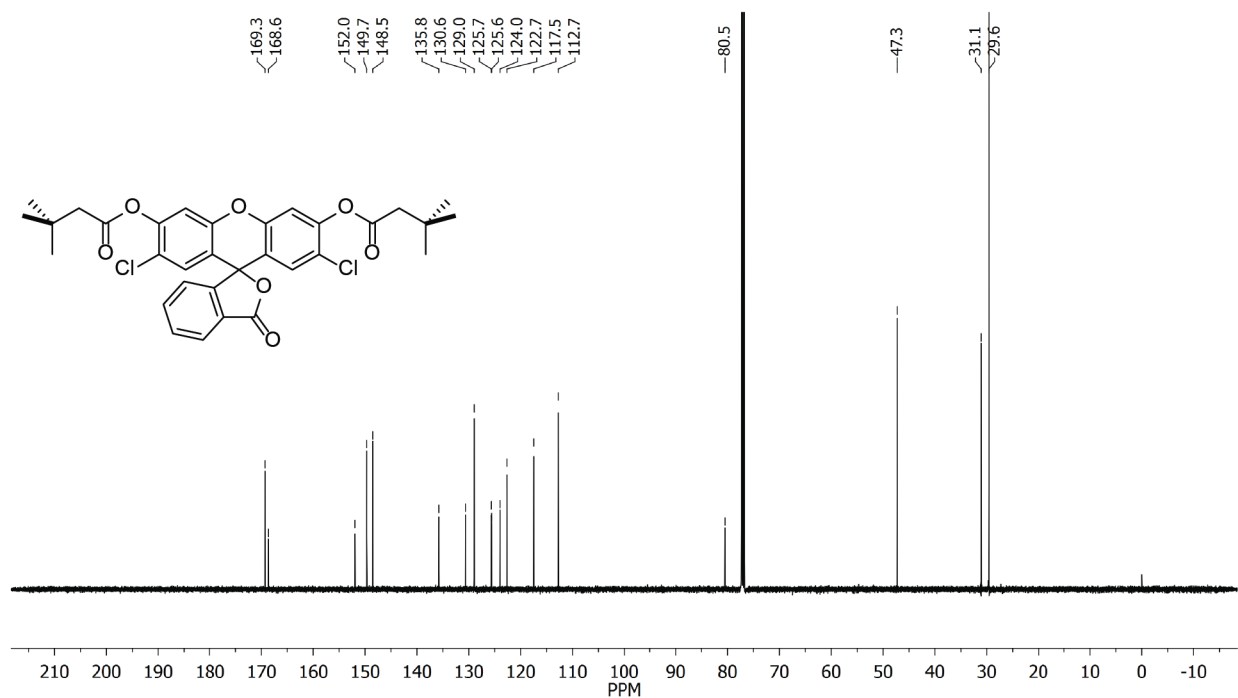

$^1\text{H}$  NMR ( $\text{CDCl}_3$ ) and  $^{13}\text{C}$  NMR ( $\text{CDCl}_3$ ) Spectra of Compound **3e**

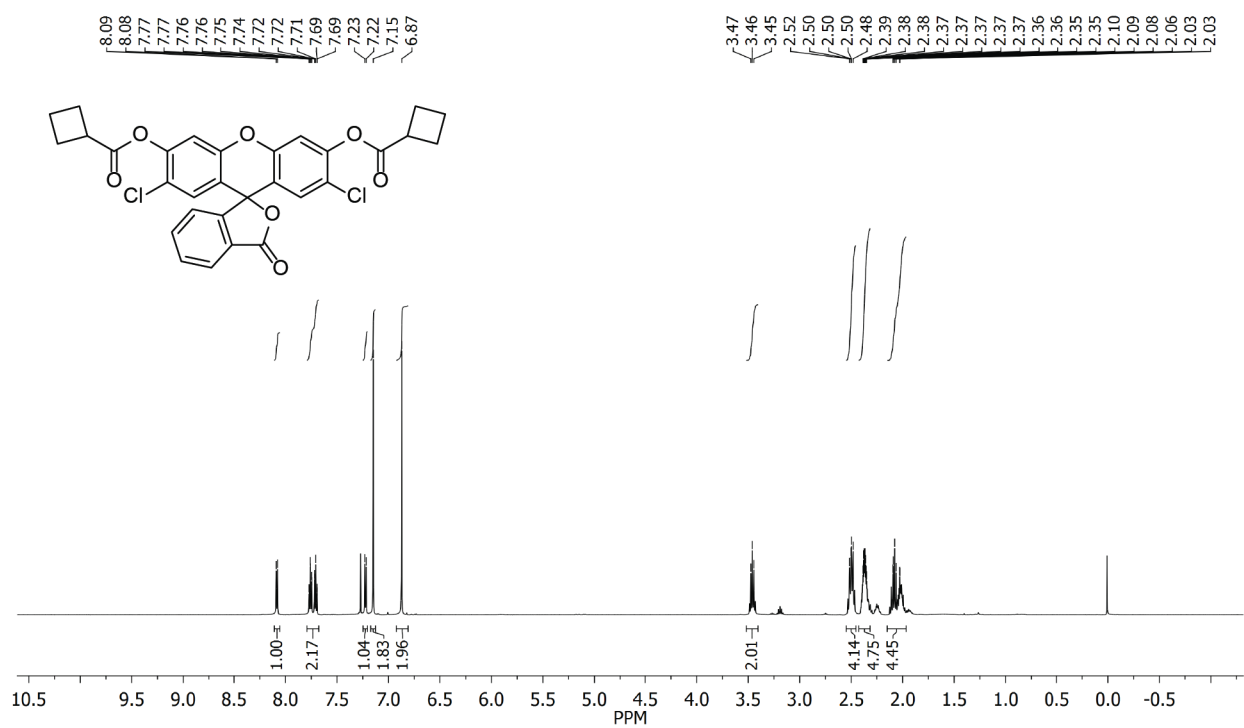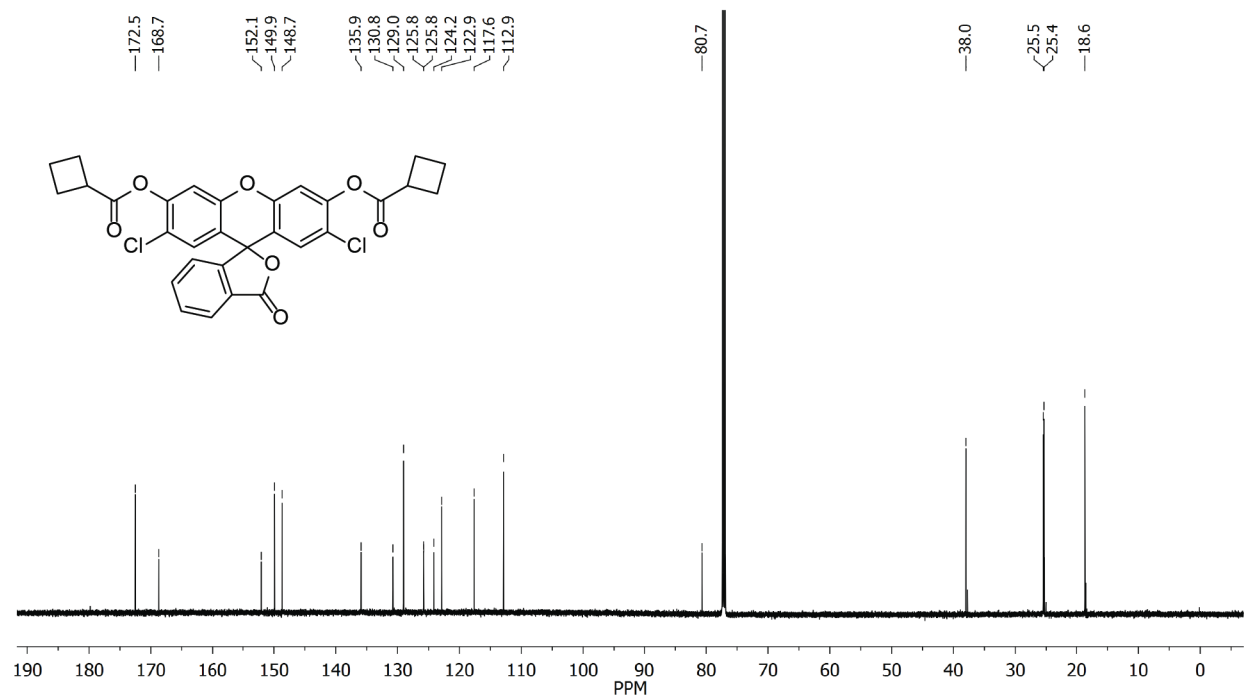

$^1\text{H}$  NMR ( $\text{CDCl}_3$ ) and  $^{13}\text{C}$  NMR ( $\text{CDCl}_3$ ) Spectra of Compound **3f**

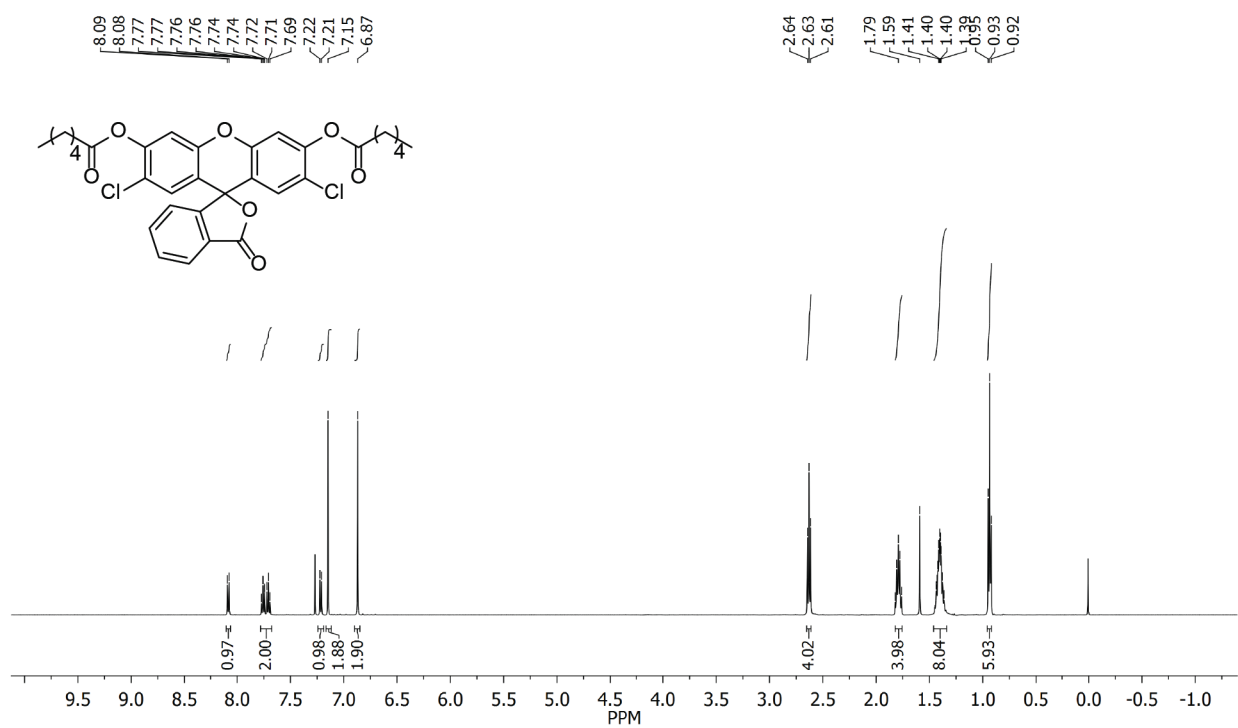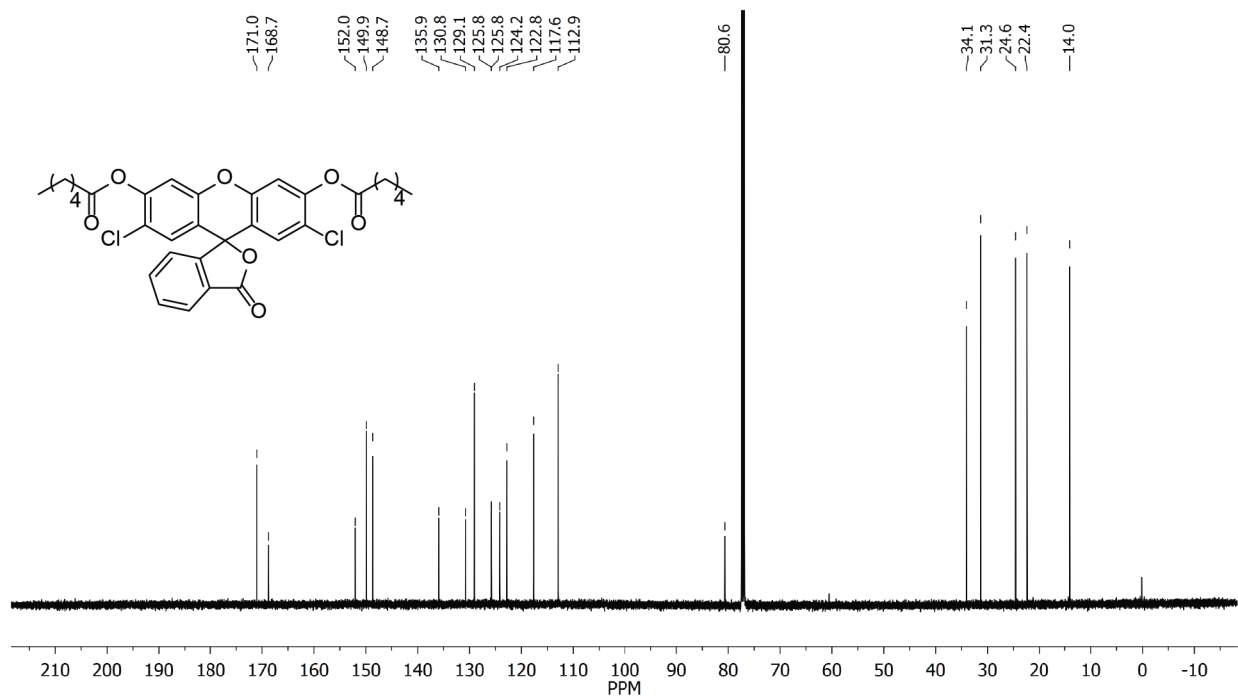

$^1\text{H}$  NMR ( $\text{CDCl}_3$ ) and  $^{13}\text{C}$  NMR ( $\text{CDCl}_3$ ) Spectra of Compound **3g**

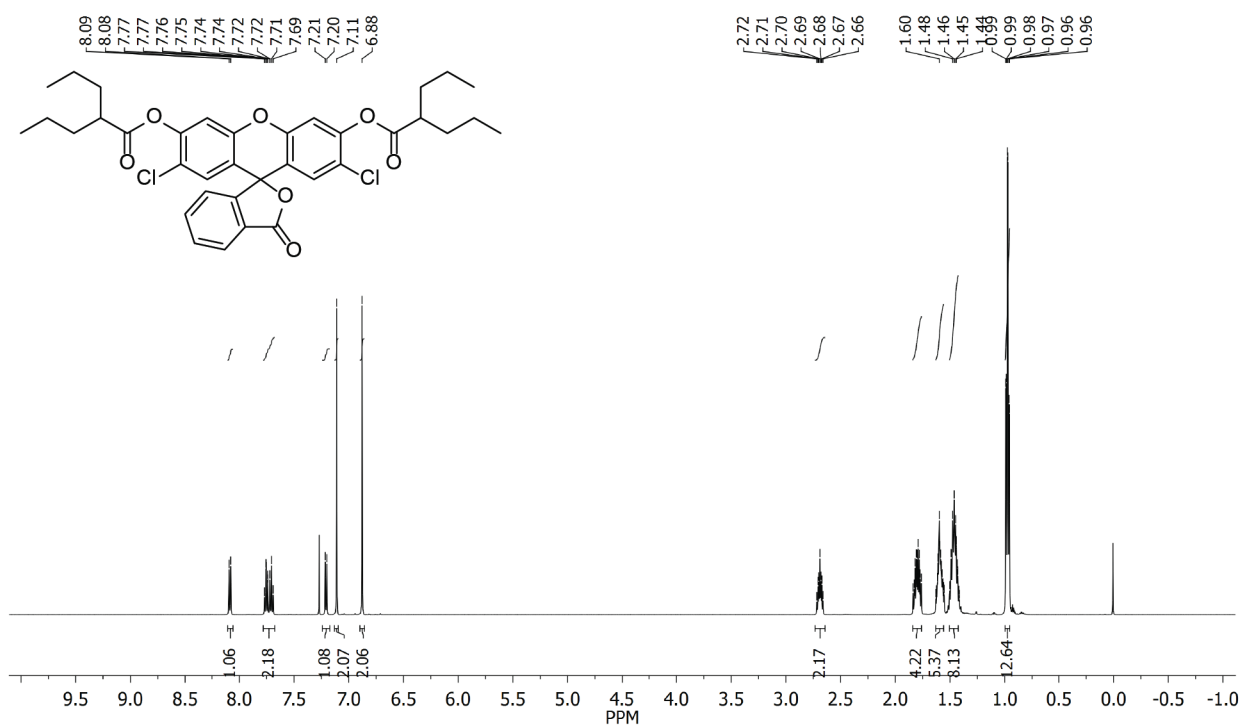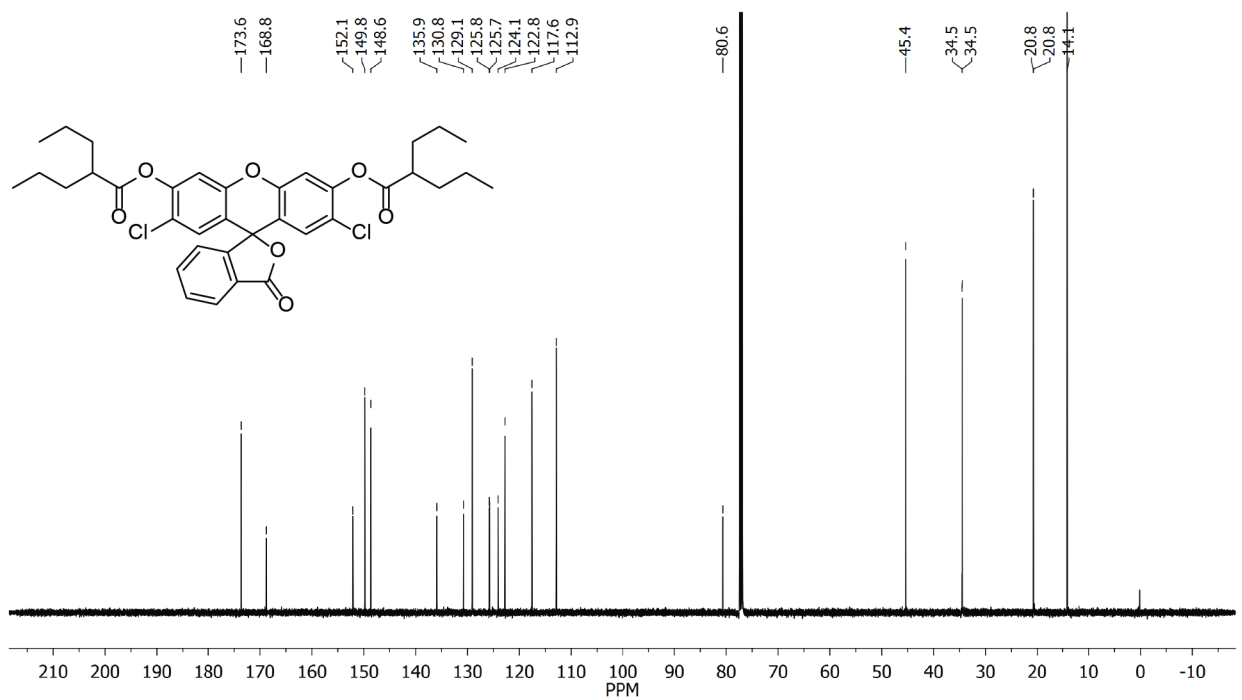

# $^1\text{H}$ NMR ( $\text{CDCl}_3$ ) and $^{13}\text{C}$ NMR ( $\text{CDCl}_3$ ) Spectra of Compound AM

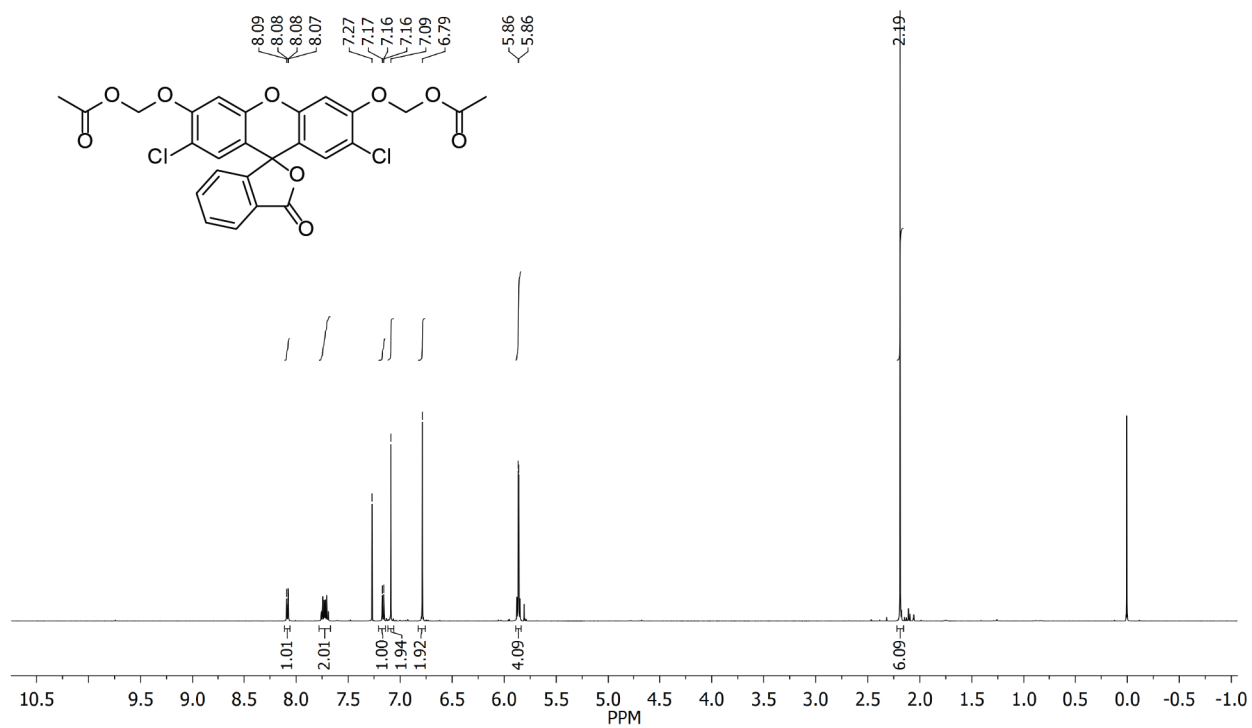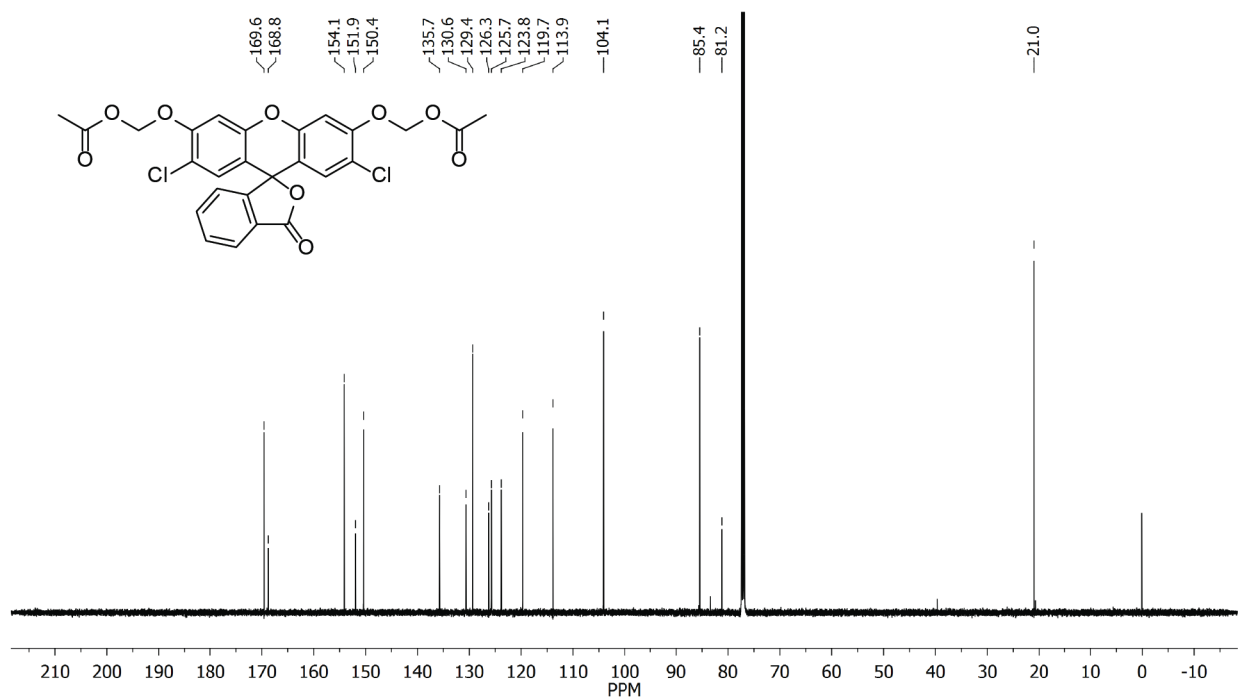

## IR Spectra

IR Spectrum of Compound **1a**, 1200–3500  $\text{cm}^{-1}$

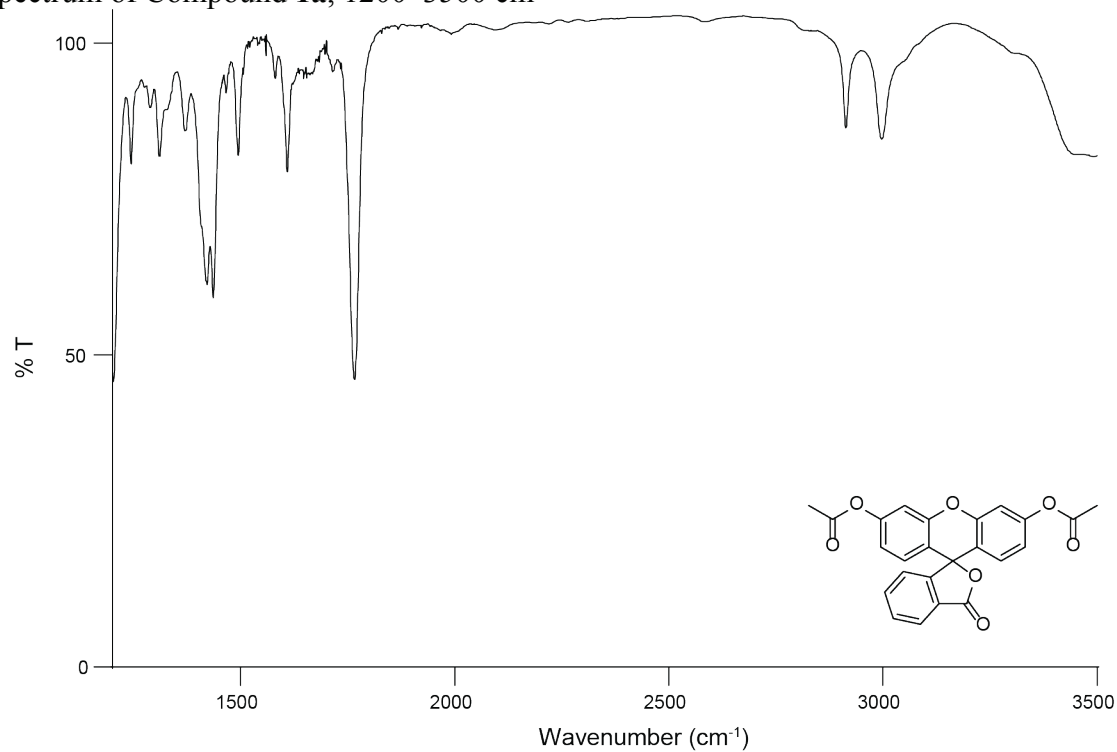

IR Spectrum of Compound **1b**, 1200–3500  $\text{cm}^{-1}$

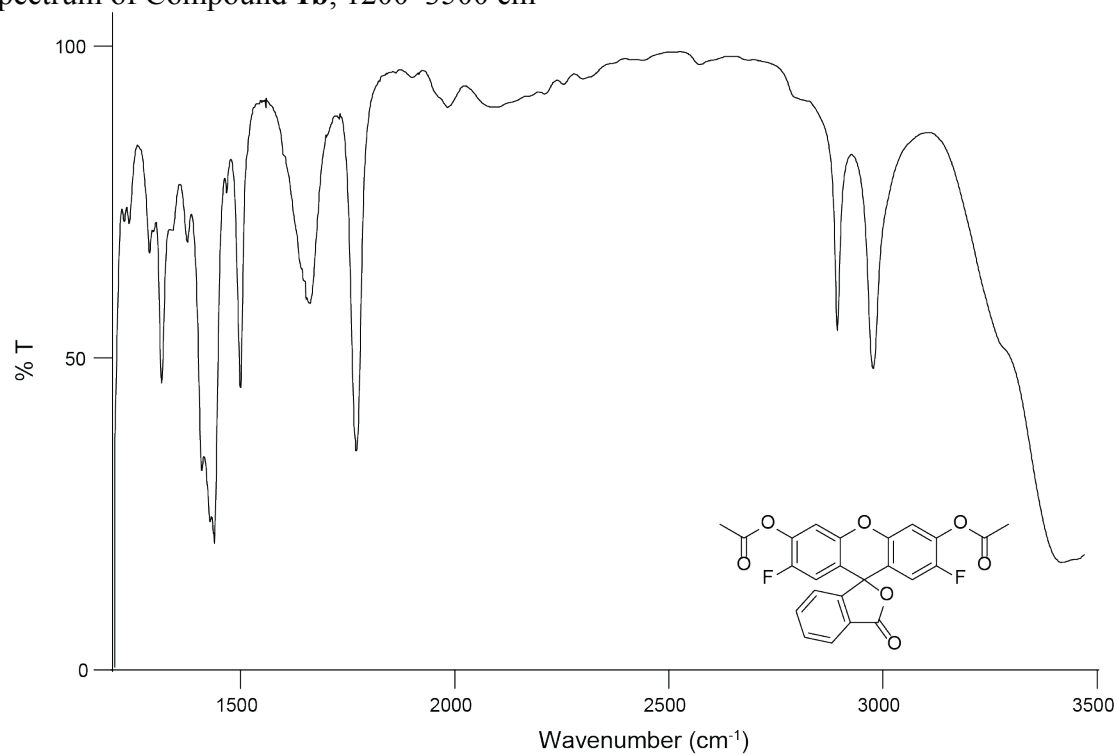

IR Spectrum of Compound **1c**, 1200–3500  $\text{cm}^{-1}$

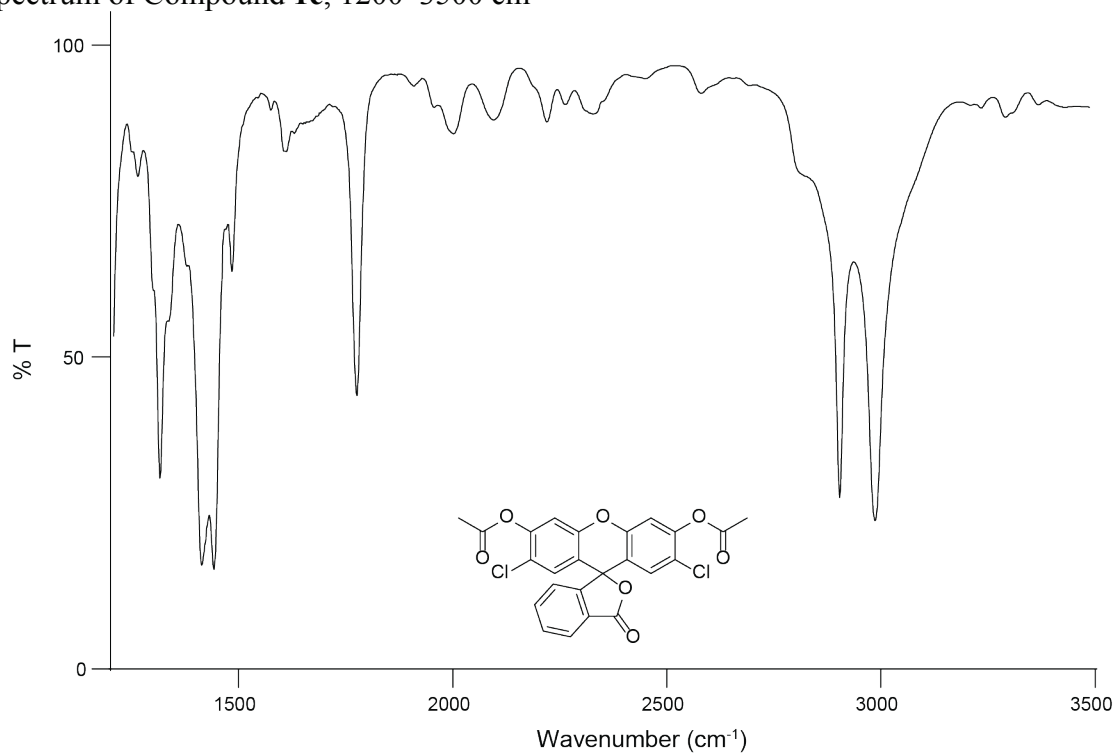

IR Spectrum of Compound **1d**, 1200–3500  $\text{cm}^{-1}$

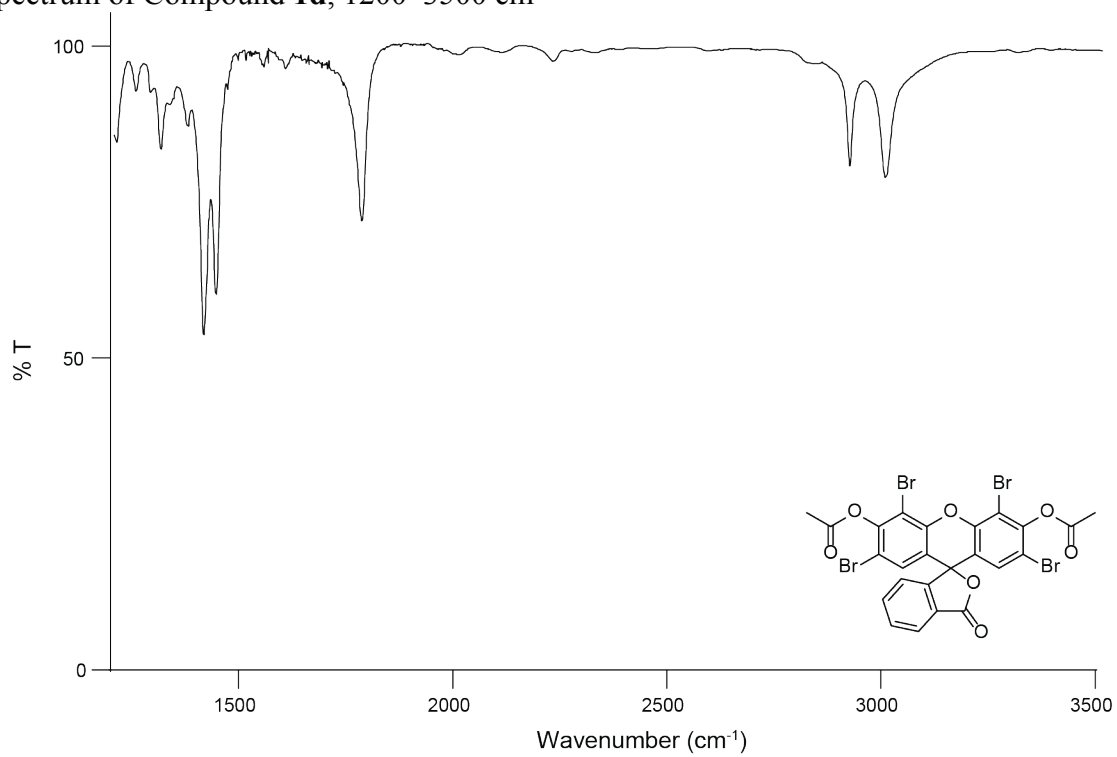

IR Spectrum of Compound **1e**, 1200–3500  $\text{cm}^{-1}$

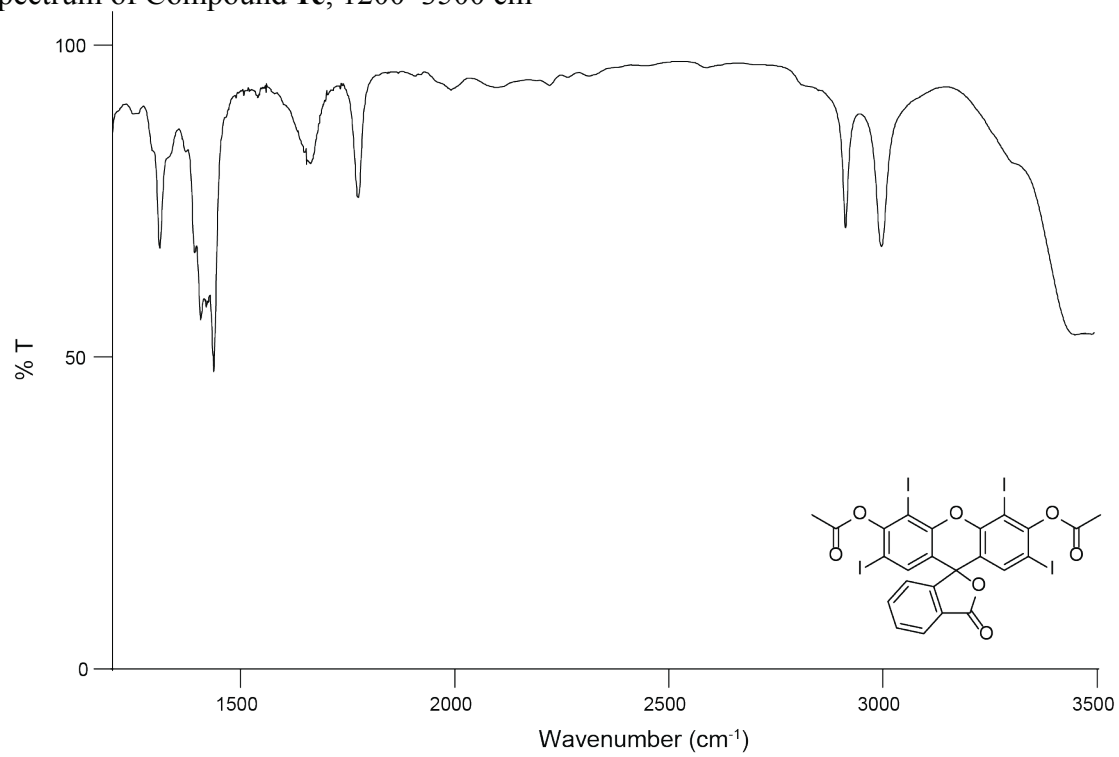

IR Spectrum of Compound **2a**, 1200–3500  $\text{cm}^{-1}$

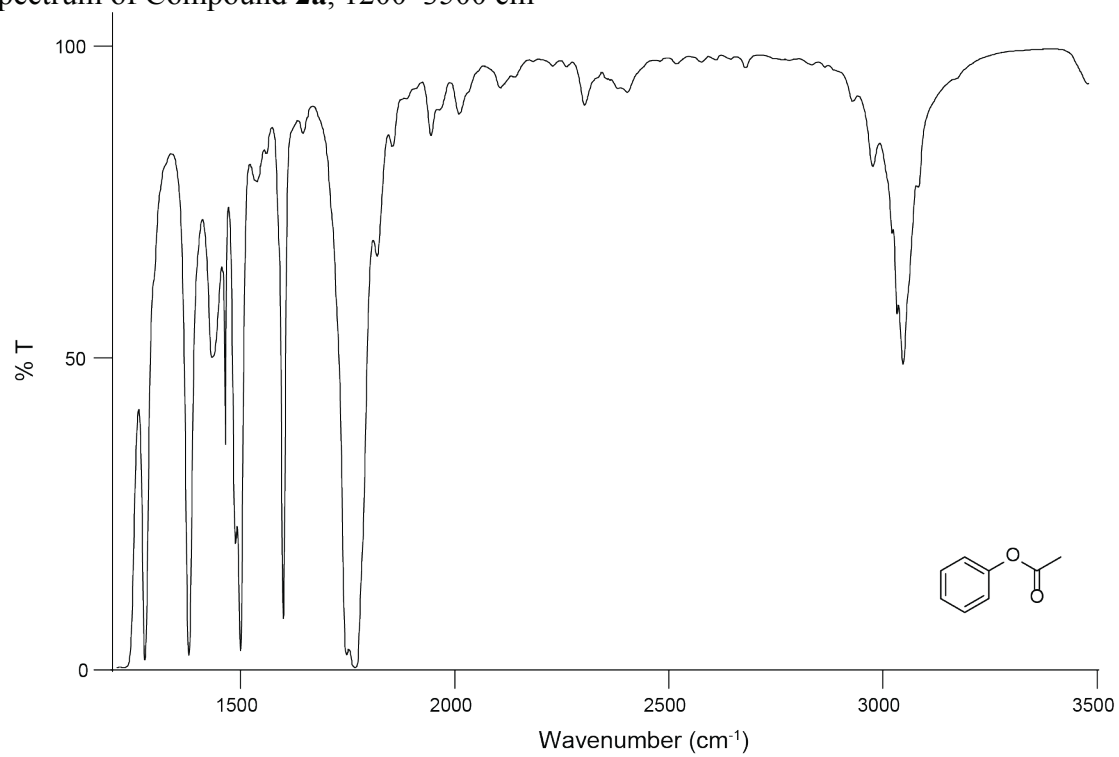



IR Spectrum of Compound **2b**, 1200–3500  $\text{cm}^{-1}$

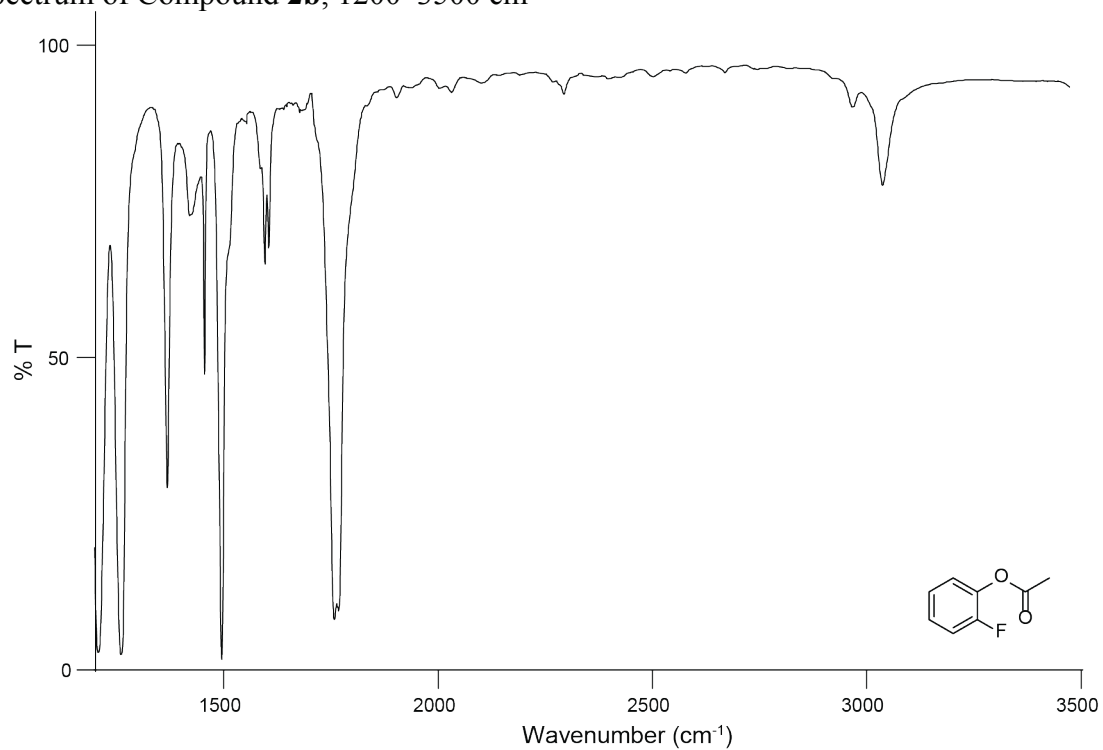

IR Spectrum of Compound **2c**, 1200–3500  $\text{cm}^{-1}$

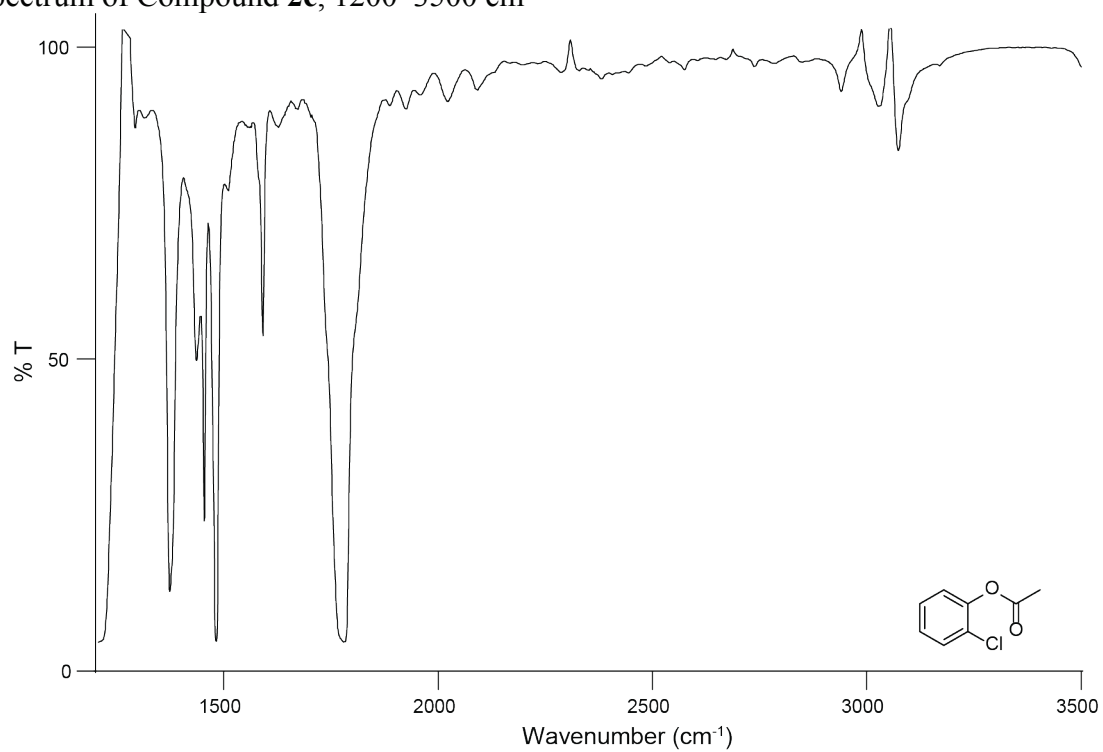

IR Spectrum of Compound **2d**, 1200–3500  $\text{cm}^{-1}$

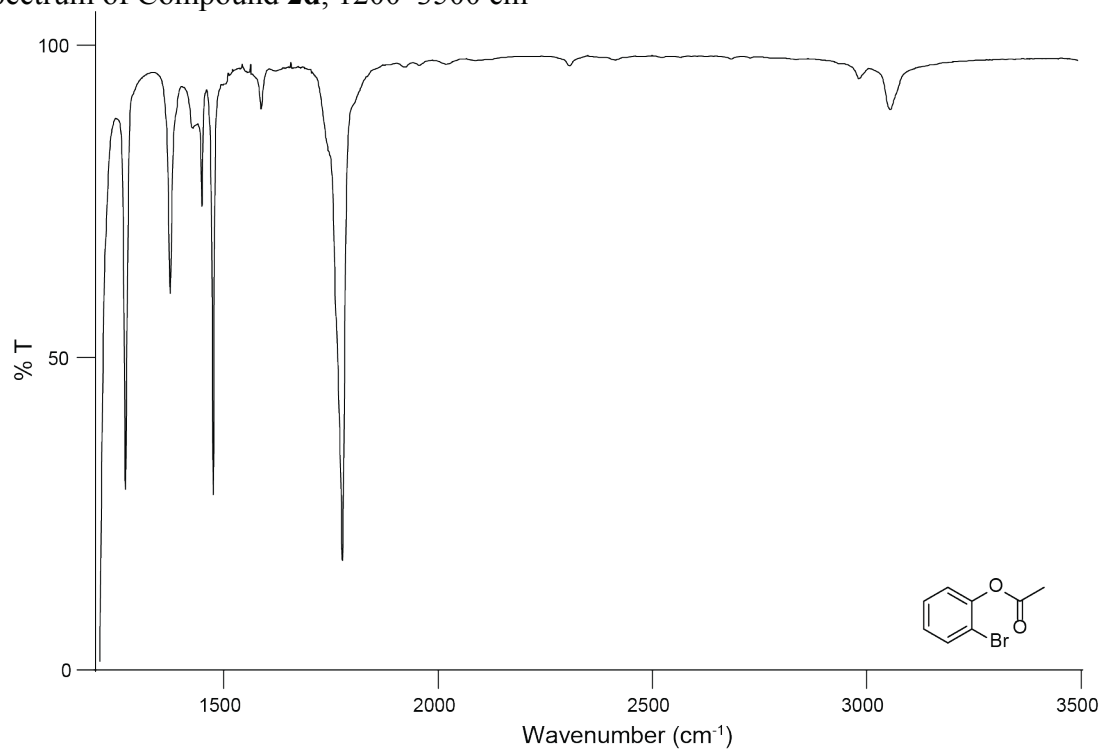

IR Spectrum of Compound **2e**, 1200–3500  $\text{cm}^{-1}$

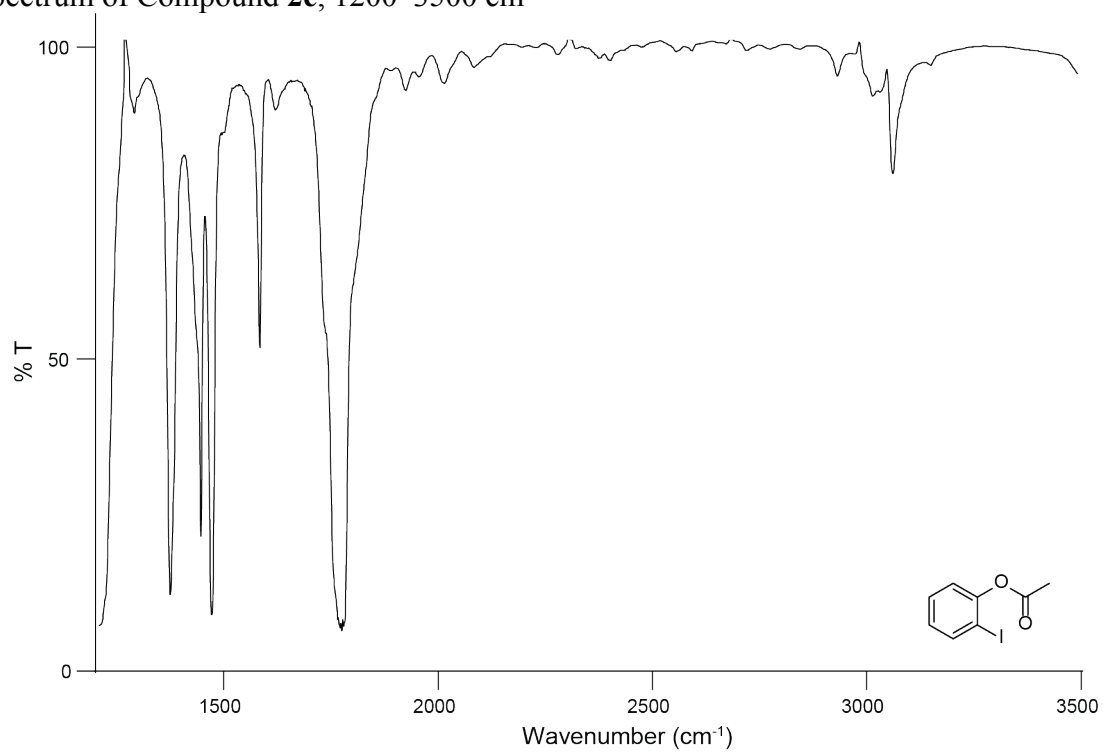

## Dihedral-Angle Scans

Dihedral-angle scan of compound **2a**, Figure 3A.

| $d$   | $\omega$ | $E - E_0$ | $E$ (Hartrees) |
|-------|----------|-----------|----------------|
| 3.293 | 130.348  | 2.4920    | -460.0649      |
| 3.337 | 130.830  | 2.4881    | -460.0649      |
| 3.377 | 130.173  | 2.4584    | -460.0650      |
| 3.417 | 129.850  | 2.4848    | -460.0649      |
| 3.455 | 130.060  | 2.5527    | -460.0648      |
| 3.493 | 130.137  | 2.6428    | -460.0647      |
| 3.532 | 130.265  | 2.7396    | -460.0645      |
| 3.568 | 130.370  | 2.8440    | -460.0644      |
| 3.603 | 130.253  | 2.9622    | -460.0642      |
| 3.635 | 130.017  | 3.0943    | -460.0640      |
| 3.666 | 129.816  | 3.2527    | -460.0637      |
| 3.696 | 129.216  | 3.4341    | -460.0634      |
| 3.723 | 128.880  | 3.6416    | -460.0631      |
| 3.748 | 128.499  | 3.8806    | -460.0627      |
| 3.771 | 127.927  | 4.1439    | -460.0623      |
| 3.792 | 127.143  | 4.4226    | -460.0619      |
| 3.809 | 125.971  | 4.7052    | -460.0614      |
| 3.825 | 125.197  | 5.0035    | -460.0609      |
| 3.839 | 124.485  | 5.3275    | -460.0604      |
| 3.852 | 123.784  | 5.6767    | -460.0599      |
| 3.863 | 122.953  | 6.0458    | -460.0593      |
| 3.87  | 121.752  | 6.4231    | -460.0587      |
| 3.875 | 120.497  | 6.8006    | -460.0581      |
| 3.879 | 119.232  | 7.1848    | -460.0574      |
| 3.881 | 117.981  | 7.5794    | -460.0568      |
| 3.881 | 116.693  | 7.9885    | -460.0562      |
| 3.88  | 115.410  | 8.4077    | -460.0555      |
| 3.877 | 114.053  | 8.8259    | -460.0548      |
| 3.87  | 112.514  | 9.2279    | -460.0542      |
| 3.819 | 123.599  | 1.9130    | -460.0659      |
| 3.813 | 122.209  | 1.7307    | -460.0661      |
| 3.805 | 120.718  | 1.5436    | -460.0664      |
| 3.795 | 119.118  | 1.3529    | -460.0667      |
| 3.782 | 117.551  | 1.1656    | -460.0670      |
| 3.767 | 116.121  | 0.9912    | -460.0673      |
| 3.75  | 114.454  | 0.8314    | -460.0676      |
| 3.73  | 112.551  | 0.6727    | -460.0678      |
| 3.707 | 111.063  | 0.5387    | -460.0680      |
| 3.68  | 109.653  | 0.4268    | -460.0682      |
| 3.652 | 108.180  | 0.3363    | -460.0684      |
| 3.622 | 106.613  | 0.2657    | -460.0685      |

|       |         |        |           |
|-------|---------|--------|-----------|
| 3.589 | 105.113 | 0.2116 | -460.0686 |
| 3.553 | 103.647 | 0.1690 | -460.0686 |
| 3.517 | 101.629 | 0.1174 | -460.0687 |
| 3.478 | 99.978  | 0.0686 | -460.0688 |
| 3.439 | 98.109  | 0.0305 | -460.0689 |
| 3.399 | 96.117  | 0.0070 | -460.0689 |
| 3.357 | 93.917  | 0.0152 | -460.0689 |
| 3.312 | 92.105  | 0.0544 | -460.0688 |
| 3.266 | 90.547  | 0.0819 | -460.0688 |
| 3.218 | 88.434  | 0.0685 | -460.0688 |
| 3.171 | 86.798  | 0.0326 | -460.0688 |
| 3.128 | 84.731  | 0.0000 | -460.0689 |
| 3.087 | 82.750  | 0.0229 | -460.0689 |
| 3.046 | 79.949  | 0.0543 | -460.0688 |
| 3.005 | 77.935  | 0.1032 | -460.0687 |
| 2.966 | 75.911  | 0.1548 | -460.0687 |
| 2.929 | 73.637  | 0.2035 | -460.0686 |
| 2.895 | 71.811  | 0.2586 | -460.0685 |
| 2.868 | 69.945  | 0.3303 | -460.0684 |
| 2.84  | 68.064  | 0.4225 | -460.0682 |
| 2.817 | 66.280  | 0.5369 | -460.0680 |
| 2.799 | 64.556  | 0.6733 | -460.0678 |
| 2.788 | 62.816  | 0.8295 | -460.0676 |
| 2.78  | 60.988  | 0.9980 | -460.0673 |
| 2.774 | 59.174  | 1.1641 | -460.0670 |
| 2.771 | 57.680  | 1.3434 | -460.0668 |
| 2.769 | 56.172  | 1.5227 | -460.0665 |
| 2.769 | 54.759  | 1.6961 | -460.0662 |
| 2.771 | 53.476  | 1.8625 | -460.0659 |
| 2.774 | 52.242  | 2.0176 | -460.0657 |
| 2.777 | 51.166  | 2.1554 | -460.0655 |
| 2.785 | 49.963  | 2.2665 | -460.0653 |
| 2.788 | 49.299  | 2.3247 | -460.0652 |
| 2.79  | 49.023  | 2.3529 | -460.0651 |
| 2.792 | 49.047  | 2.3550 | -460.0651 |
| 2.789 | 49.248  | 2.3307 | -460.0652 |
| 2.786 | 49.826  | 2.2777 | -460.0653 |
| 2.778 | 51.002  | 2.1743 | -460.0654 |
| 2.774 | 52.067  | 2.0394 | -460.0656 |
| 2.771 | 53.297  | 1.8866 | -460.0659 |
| 2.769 | 54.562  | 1.7215 | -460.0662 |
| 2.769 | 55.954  | 1.5491 | -460.0664 |
| 2.77  | 57.456  | 1.3704 | -460.0667 |
| 2.773 | 58.963  | 1.1906 | -460.0670 |
| 2.78  | 60.430  | 1.0184 | -460.0673 |
| 2.789 | 62.143  | 0.8577 | -460.0675 |
| 2.797 | 64.281  | 0.6957 | -460.0678 |

|       |        |        |           |
|-------|--------|--------|-----------|
| 2.814 | 66.013 | 0.5559 | -460.0680 |
| 2.837 | 67.792 | 0.4381 | -460.0682 |
| 2.863 | 69.661 | 0.3428 | -460.0684 |
| 2.891 | 71.556 | 0.2681 | -460.0685 |
| 2.924 | 73.381 | 0.2108 | -460.0686 |
| 2.961 | 75.259 | 0.1664 | -460.0686 |
| 2.999 | 77.626 | 0.1110 | -460.0687 |
| 3.039 | 79.664 | 0.0607 | -460.0688 |
| 3.08  | 81.892 | 0.0229 | -460.0689 |
| 3.121 | 83.990 | 0.0090 | -460.0689 |
| 3.165 | 86.488 | 0.0262 | -460.0689 |
| 3.211 | 88.200 | 0.0635 | -460.0688 |
| 3.259 | 89.757 | 0.0857 | -460.0688 |

Dihedral-angle scan of compound **2b**, Figure 3B.

| $d$   | $\omega$ | $E - E_0$ | $E$ (Hartrees) |
|-------|----------|-----------|----------------|
| 2.995 | 78.425   | 0.0000    | -559.3075      |
| 2.959 | 76.755   | 0.0445    | -559.3075      |
| 2.927 | 74.900   | 0.1249    | -559.3073      |
| 2.894 | 73.589   | 0.2674    | -559.3071      |
| 2.866 | 72.627   | 0.4653    | -559.3068      |
| 2.845 | 71.814   | 0.7330    | -559.3064      |
| 2.831 | 71.091   | 1.0780    | -559.3058      |
| 2.820 | 70.375   | 1.5001    | -559.3051      |
| 2.812 | 69.622   | 1.9902    | -559.3044      |
| 2.807 | 68.908   | 2.5356    | -559.3035      |
| 2.806 | 68.173   | 3.1305    | -559.3025      |
| 2.808 | 67.450   | 3.7696    | -559.3015      |
| 2.811 | 66.723   | 4.4450    | -559.3004      |
| 2.817 | 65.970   | 5.1453    | -559.2993      |
| 2.825 | 65.266   | 5.8560    | -559.2982      |
| 2.834 | 64.595   | 6.5632    | -559.2971      |
| 2.846 | 63.869   | 7.2604    | -559.2960      |
| 2.866 | 62.801   | 7.9396    | -559.2949      |
| 2.890 | 61.714   | 8.5917    | -559.2938      |
| 2.915 | 60.616   | 9.2107    | -559.2928      |
| 2.958 | 58.839   | 9.7684    | -559.2920      |
| 2.891 | 61.639   | 8.6453    | -559.2938      |
| 2.869 | 62.689   | 7.9957    | -559.2948      |
| 2.848 | 63.790   | 7.3185    | -559.2959      |
| 2.835 | 64.543   | 6.6224    | -559.2970      |
| 2.826 | 65.210   | 5.9160    | -559.2981      |
| 2.818 | 65.909   | 5.2051    | -559.2992      |
| 2.812 | 66.666   | 4.5033    | -559.3004      |

|       |         |        |           |
|-------|---------|--------|-----------|
| 2.808 | 67.391  | 3.8253 | -559.3014 |
| 2.806 | 68.120  | 3.1828 | -559.3025 |
| 2.807 | 68.845  | 2.5839 | -559.3034 |
| 2.812 | 69.556  | 2.0342 | -559.3043 |
| 2.819 | 70.305  | 1.5390 | -559.3051 |
| 2.830 | 71.034  | 1.1107 | -559.3058 |
| 2.844 | 71.761  | 0.7591 | -559.3063 |
| 2.864 | 72.564  | 0.4850 | -559.3068 |
| 2.891 | 73.494  | 0.2817 | -559.3071 |
| 2.924 | 74.790  | 0.1349 | -559.3073 |
| 2.958 | 76.248  | 0.0422 | -559.3075 |
| 2.993 | 77.857  | 0.0068 | -559.3075 |
| 3.030 | 79.805  | 0.0253 | -559.3075 |
| 3.072 | 81.729  | 0.1204 | -559.3073 |
| 3.124 | 83.991  | 0.2346 | -559.3072 |
| 3.178 | 85.620  | 0.3457 | -559.3070 |
| 3.234 | 87.422  | 0.4503 | -559.3068 |
| 3.290 | 89.351  | 0.5357 | -559.3067 |
| 3.344 | 91.866  | 0.5708 | -559.3066 |
| 3.395 | 94.266  | 0.6215 | -559.3065 |
| 3.444 | 96.603  | 0.6790 | -559.3064 |
| 3.491 | 99.311  | 0.7526 | -559.3063 |
| 3.536 | 101.569 | 0.8200 | -559.3062 |
| 3.579 | 103.337 | 0.8913 | -559.3061 |
| 3.623 | 105.029 | 0.9588 | -559.3060 |
| 3.664 | 106.594 | 1.0138 | -559.3059 |
| 3.702 | 108.314 | 1.0636 | -559.3058 |
| 3.736 | 109.766 | 1.1231 | -559.3057 |
| 3.768 | 111.289 | 1.1962 | -559.3056 |
| 3.796 | 112.796 | 1.2891 | -559.3055 |
| 3.821 | 114.220 | 1.4095 | -559.3053 |
| 3.843 | 115.698 | 1.5578 | -559.3050 |
| 3.861 | 117.527 | 1.7251 | -559.3048 |
| 3.877 | 119.268 | 1.9008 | -559.3045 |
| 3.891 | 121.122 | 2.0823 | -559.3042 |
| 3.902 | 122.747 | 2.2699 | -559.3039 |
| 3.912 | 124.299 | 2.4566 | -559.3036 |
| 3.919 | 125.738 | 2.6404 | -559.3033 |
| 3.924 | 127.064 | 2.8175 | -559.3030 |
| 3.927 | 128.531 | 2.9788 | -559.3028 |
| 3.927 | 129.798 | 3.0931 | -559.3026 |
| 3.927 | 130.549 | 3.1386 | -559.3025 |
| 3.927 | 130.568 | 3.1404 | -559.3025 |
| 3.927 | 130.009 | 3.0945 | -559.3026 |
| 3.927 | 128.682 | 2.9905 | -559.3028 |
| 3.925 | 127.178 | 2.8321 | -559.3030 |
| 3.920 | 125.860 | 2.6556 | -559.3033 |

|       |         |        |           |
|-------|---------|--------|-----------|
| 3.912 | 124.424 | 2.4722 | -559.3036 |
| 3.903 | 122.886 | 2.2858 | -559.3039 |
| 3.892 | 121.249 | 2.0980 | -559.3042 |
| 3.878 | 119.738 | 1.9173 | -559.3045 |
| 3.862 | 117.694 | 1.7396 | -559.3048 |
| 3.844 | 115.833 | 1.5715 | -559.3050 |
| 3.823 | 114.332 | 1.4209 | -559.3053 |
| 3.798 | 112.917 | 1.2981 | -559.3055 |
| 3.770 | 111.423 | 1.2031 | -559.3056 |
| 3.739 | 109.894 | 1.1287 | -559.3057 |
| 3.705 | 108.435 | 1.0681 | -559.3058 |
| 3.668 | 106.695 | 1.0182 | -559.3059 |
| 3.627 | 105.144 | 0.9637 | -559.3060 |
| 3.583 | 103.485 | 0.8975 | -559.3061 |
| 3.540 | 101.728 | 0.8257 | -559.3062 |
| 3.495 | 99.534  | 0.7584 | -559.3063 |
| 3.449 | 97.217  | 0.6949 | -559.3064 |
| 3.399 | 94.497  | 0.6258 | -559.3065 |
| 3.348 | 92.052  | 0.5751 | -559.3066 |
| 3.294 | 90.109  | 0.5232 | -559.3067 |
| 3.238 | 88.169  | 0.4585 | -559.3068 |
| 3.183 | 85.761  | 0.3550 | -559.3070 |
| 3.128 | 84.133  | 0.2438 | -559.3071 |
| 3.076 | 81.943  | 0.1304 | -559.3073 |
| 3.033 | 79.944  | 0.0309 | -559.3075 |
| 2.996 | 78.449  | 0.0000 | -559.3075 |

Dihedral-angle scan of compound **2c**, Figure 3C.

| $d$   | $\omega$ | $E - E_0$ | $E$ (Hartrees) |
|-------|----------|-----------|----------------|
| 3.367 | 119.144  | 2.6658    | -919.6638      |
| 3.416 | 120.167  | 2.6837    | -919.6638      |
| 3.464 | 121.443  | 2.7207    | -919.6637      |
| 3.514 | 122.631  | 2.7793    | -919.6636      |
| 3.563 | 122.688  | 2.8577    | -919.6635      |
| 3.614 | 122.968  | 2.9720    | -919.6633      |
| 3.668 | 123.288  | 3.1255    | -919.6631      |
| 3.722 | 123.720  | 3.2759    | -919.6628      |
| 3.773 | 124.085  | 3.3963    | -919.6626      |
| 3.817 | 123.935  | 3.5167    | -919.6625      |
| 3.856 | 123.960  | 3.6728    | -919.6622      |
| 3.895 | 123.904  | 3.8644    | -919.6619      |
| 3.934 | 123.717  | 4.0791    | -919.6616      |
| 3.973 | 123.417  | 4.3151    | -919.6612      |
| 4.010 | 123.215  | 4.5499    | -919.6608      |

|       |         |        |           |
|-------|---------|--------|-----------|
| 4.044 | 123.225 | 4.7918 | -919.6604 |
| 4.073 | 122.787 | 5.0584 | -919.6600 |
| 4.098 | 121.862 | 5.3430 | -919.6595 |
| 4.120 | 120.826 | 5.6255 | -919.6591 |
| 4.141 | 119.999 | 5.9191 | -919.6586 |
| 4.160 | 119.327 | 6.2304 | -919.6581 |
| 4.177 | 118.588 | 6.5598 | -919.6576 |
| 4.191 | 117.857 | 6.9046 | -919.6571 |
| 4.204 | 117.189 | 7.2599 | -919.6565 |
| 4.215 | 116.471 | 7.6218 | -919.6559 |
| 4.224 | 115.675 | 7.9922 | -919.6553 |
| 4.230 | 114.681 | 8.3775 | -919.6547 |
| 4.232 | 113.440 | 8.7738 | -919.6541 |
| 4.234 | 112.213 | 9.1717 | -919.6534 |
| 4.234 | 111.058 | 9.5640 | -919.6528 |
| 4.161 | 132.608 | 3.2021 | -919.6630 |
| 4.157 | 130.721 | 3.0164 | -919.6633 |
| 4.150 | 129.233 | 2.8154 | -919.6636 |
| 4.141 | 127.520 | 2.6045 | -919.6639 |
| 4.129 | 125.831 | 2.3827 | -919.6643 |
| 4.114 | 124.208 | 2.1631 | -919.6646 |
| 4.097 | 122.255 | 1.9513 | -919.6649 |
| 4.078 | 120.455 | 1.7497 | -919.6653 |
| 4.054 | 118.727 | 1.5618 | -919.6656 |
| 4.029 | 116.940 | 1.3892 | -919.6658 |
| 4.000 | 115.088 | 1.2355 | -919.6661 |
| 3.969 | 113.348 | 1.1088 | -919.6663 |
| 3.935 | 111.661 | 1.0166 | -919.6664 |
| 3.898 | 109.521 | 0.9494 | -919.6665 |
| 3.858 | 107.337 | 0.8929 | -919.6666 |
| 3.813 | 105.476 | 0.8364 | -919.6667 |
| 3.761 | 103.965 | 0.7686 | -919.6668 |
| 3.706 | 102.277 | 0.6655 | -919.6670 |
| 3.654 | 100.052 | 0.5440 | -919.6672 |
| 3.602 | 97.855  | 0.4396 | -919.6674 |
| 3.548 | 95.084  | 0.3377 | -919.6675 |
| 3.494 | 92.897  | 0.2563 | -919.6676 |
| 3.435 | 91.176  | 0.1790 | -919.6678 |
| 3.380 | 89.612  | 0.1015 | -919.6679 |
| 3.328 | 88.246  | 0.0373 | -919.6680 |
| 3.281 | 86.519  | 0.0000 | -919.6681 |
| 3.239 | 84.905  | 0.0061 | -919.6680 |
| 3.203 | 83.587  | 0.0743 | -919.6679 |
| 3.176 | 81.953  | 0.2021 | -919.6677 |
| 3.150 | 81.062  | 0.4205 | -919.6674 |
| 3.124 | 80.198  | 0.7223 | -919.6669 |
| 3.102 | 79.204  | 1.0987 | -919.6663 |



|       |         |         |           |
|-------|---------|---------|-----------|
| 3.082 | 78.262  | 1.5506  | -919.6656 |
| 3.068 | 77.439  | 2.0764  | -919.6647 |
| 3.058 | 76.516  | 2.6707  | -919.6638 |
| 3.051 | 75.675  | 3.3253  | -919.6628 |
| 3.045 | 74.972  | 4.0334  | -919.6616 |
| 3.041 | 74.432  | 4.7913  | -919.6604 |
| 3.039 | 73.967  | 5.5880  | -919.6592 |
| 3.038 | 73.591  | 6.4095  | -919.6578 |
| 3.038 | 73.322  | 7.2424  | -919.6565 |
| 3.038 | 73.159  | 8.0757  | -919.6552 |
| 3.039 | 73.054  | 8.9093  | -919.6539 |
| 3.039 | 73.261  | 9.7347  | -919.6525 |
| 3.031 | 74.332  | 10.5279 | -919.6513 |
| 3.001 | 77.351  | 11.2606 | -919.6501 |
| 2.915 | 93.465  | 11.7770 | -919.6493 |
| 2.913 | 102.031 | 11.6938 | -919.6494 |
| 2.921 | 105.196 | 11.3813 | -919.6499 |
| 2.924 | 106.599 | 10.9473 | -919.6506 |
| 2.928 | 107.685 | 10.4397 | -919.6514 |
| 2.932 | 108.544 | 9.8818  | -919.6523 |
| 2.936 | 109.181 | 9.2924  | -919.6532 |
| 2.939 | 109.584 | 8.6932  | -919.6542 |
| 2.943 | 109.901 | 8.1027  | -919.6551 |
| 2.949 | 110.246 | 7.5295  | -919.6561 |
| 2.956 | 110.672 | 6.9778  | -919.6569 |
| 2.964 | 111.131 | 6.4520  | -919.6578 |
| 2.974 | 111.571 | 5.9608  | -919.6586 |
| 2.985 | 111.984 | 5.5134  | -919.6593 |
| 2.998 | 112.404 | 5.1178  | -919.6599 |
| 3.037 | 112.655 | 4.4781  | -919.6609 |
| 3.099 | 110.913 | 3.9563  | -919.6618 |
| 3.128 | 111.754 | 3.5884  | -919.6623 |
| 3.161 | 112.696 | 3.2827  | -919.6628 |
| 3.196 | 113.861 | 3.0397  | -919.6632 |
| 3.235 | 115.177 | 2.8594  | -919.6635 |
| 3.276 | 116.557 | 2.7402  | -919.6637 |
| 3.320 | 117.940 | 2.6784  | -919.6638 |
| 3.367 | 119.159 | 2.6657  | -919.6638 |

Dihedral-angle scan of compound **2d**, Figure 3D.

| $d$   | $\omega$ | $E - E_0$ | $E$ (Hartrees) |
|-------|----------|-----------|----------------|
| 3.495 | 118.020  | 2.5894    | -3033.6474     |
| 3.543 | 118.900  | 2.5864    | -3033.6474     |
| 3.585 | 119.643  | 2.6535    | -3033.6473     |

|       |         |        |            |
|-------|---------|--------|------------|
| 3.628 | 120.591 | 2.7396 | -3033.6471 |
| 3.682 | 121.864 | 2.8968 | -3033.6469 |
| 3.739 | 122.076 | 2.9999 | -3033.6467 |
| 3.786 | 121.607 | 3.1141 | -3033.6465 |
| 3.837 | 122.273 | 3.3338 | -3033.6462 |
| 3.889 | 121.652 | 3.4903 | -3033.6459 |
| 3.930 | 121.659 | 3.6803 | -3033.6456 |
| 3.971 | 121.515 | 3.8989 | -3033.6453 |
| 4.014 | 121.574 | 4.1340 | -3033.6449 |
| 4.055 | 121.759 | 4.3786 | -3033.6445 |
| 4.093 | 122.090 | 4.6201 | -3033.6441 |
| 4.126 | 121.790 | 4.8578 | -3033.6438 |
| 4.154 | 120.708 | 5.0948 | -3033.6434 |
| 4.181 | 120.284 | 5.3414 | -3033.6430 |
| 4.205 | 119.733 | 5.6111 | -3033.6426 |
| 4.227 | 119.294 | 5.9032 | -3033.6421 |
| 4.246 | 118.891 | 6.2205 | -3033.6416 |
| 4.263 | 118.291 | 6.5595 | -3033.6411 |
| 4.276 | 117.219 | 6.9049 | -3033.6405 |
| 4.289 | 116.452 | 7.2636 | -3033.6399 |
| 4.300 | 115.806 | 7.6442 | -3033.6393 |
| 4.310 | 115.033 | 8.0413 | -3033.6387 |
| 4.318 | 114.075 | 8.4485 | -3033.6380 |
| 4.324 | 113.034 | 8.8612 | -3033.6374 |
| 4.330 | 112.096 | 9.2782 | -3033.6367 |
| 4.253 | 135.793 | 3.6146 | -3033.6457 |
| 4.253 | 133.656 | 3.4489 | -3033.6460 |
| 4.249 | 131.729 | 3.2372 | -3033.6463 |
| 4.243 | 129.890 | 3.0079 | -3033.6467 |
| 4.233 | 128.165 | 2.7755 | -3033.6471 |
| 4.221 | 126.218 | 2.5412 | -3033.6475 |
| 4.207 | 124.351 | 2.3058 | -3033.6478 |
| 4.189 | 122.479 | 2.0757 | -3033.6482 |
| 4.168 | 120.808 | 1.8580 | -3033.6485 |
| 4.145 | 119.173 | 1.6553 | -3033.6489 |
| 4.118 | 117.535 | 1.4704 | -3033.6492 |
| 4.088 | 115.881 | 1.3086 | -3033.6494 |
| 4.056 | 114.029 | 1.1808 | -3033.6496 |
| 4.020 | 112.183 | 1.0862 | -3033.6498 |
| 3.976 | 110.460 | 1.0077 | -3033.6499 |
| 3.931 | 108.516 | 0.9060 | -3033.6501 |
| 3.883 | 106.212 | 0.7963 | -3033.6502 |
| 3.834 | 104.489 | 0.7125 | -3033.6504 |
| 3.784 | 102.444 | 0.6182 | -3033.6505 |
| 3.732 | 99.741  | 0.5383 | -3033.6507 |
| 3.667 | 97.901  | 0.4125 | -3033.6509 |
| 3.609 | 95.801  | 0.2683 | -3033.6511 |

|       |         |         |            |
|-------|---------|---------|------------|
| 3.554 | 94.164  | 0.1663  | -3033.6512 |
| 3.505 | 92.338  | 0.0785  | -3033.6514 |
| 3.458 | 90.249  | 0.0164  | -3033.6515 |
| 3.413 | 88.233  | 0.0000  | -3033.6515 |
| 3.366 | 86.600  | 0.0256  | -3033.6515 |
| 3.317 | 85.526  | 0.0687  | -3033.6514 |
| 3.280 | 84.670  | 0.1604  | -3033.6513 |
| 3.250 | 83.893  | 0.3354  | -3033.6510 |
| 3.225 | 83.207  | 0.5999  | -3033.6506 |
| 3.203 | 82.395  | 0.9538  | -3033.6500 |
| 3.185 | 81.509  | 1.3922  | -3033.6493 |
| 3.168 | 80.583  | 1.9096  | -3033.6485 |
| 3.154 | 79.641  | 2.4976  | -3033.6475 |
| 3.142 | 78.716  | 3.1457  | -3033.6465 |
| 3.133 | 77.728  | 3.8515  | -3033.6454 |
| 3.127 | 76.814  | 4.6072  | -3033.6442 |
| 3.124 | 75.989  | 5.4069  | -3033.6429 |
| 3.123 | 75.250  | 6.2432  | -3033.6416 |
| 3.124 | 74.572  | 7.0968  | -3033.6402 |
| 3.126 | 74.065  | 7.9667  | -3033.6388 |
| 3.127 | 73.724  | 8.8469  | -3033.6374 |
| 3.128 | 73.615  | 9.7247  | -3033.6360 |
| 3.125 | 74.079  | 10.5844 | -3033.6346 |
| 3.114 | 75.413  | 11.3976 | -3033.6333 |
| 3.093 | 78.086  | 12.1341 | -3033.6322 |
| 3.027 | 92.161  | 12.5558 | -3033.6315 |
| 3.023 | 100.144 | 12.5409 | -3033.6315 |
| 3.029 | 102.921 | 12.2438 | -3033.6320 |
| 3.035 | 104.731 | 11.8115 | -3033.6327 |
| 3.038 | 105.901 | 11.2861 | -3033.6335 |
| 3.040 | 106.721 | 10.7045 | -3033.6344 |
| 3.041 | 107.255 | 10.0914 | -3033.6354 |
| 3.043 | 107.655 | 9.4656  | -3033.6364 |
| 3.046 | 108.020 | 8.8395  | -3033.6374 |
| 3.050 | 108.318 | 8.2217  | -3033.6384 |
| 3.055 | 108.648 | 7.6221  | -3033.6394 |
| 3.062 | 108.964 | 7.0484  | -3033.6403 |
| 3.070 | 109.312 | 6.5041  | -3033.6411 |
| 3.080 | 109.717 | 5.9923  | -3033.6420 |
| 3.093 | 110.128 | 5.5232  | -3033.6427 |
| 3.108 | 110.574 | 5.1046  | -3033.6434 |
| 3.129 | 110.043 | 4.7185  | -3033.6440 |
| 3.184 | 108.545 | 4.2114  | -3033.6448 |
| 3.211 | 109.364 | 3.7701  | -3033.6455 |
| 3.239 | 110.173 | 3.4021  | -3033.6461 |
| 3.269 | 111.137 | 3.1114  | -3033.6465 |
| 3.302 | 112.206 | 2.8961  | -3033.6469 |

|       |         |        |            |
|-------|---------|--------|------------|
| 3.340 | 113.412 | 2.7463 | -3033.6471 |
| 3.387 | 114.844 | 2.6466 | -3033.6473 |
| 3.435 | 116.428 | 2.5953 | -3033.6474 |
| 3.495 | 118.062 | 2.5893 | -3033.6474 |

# Cartesian Coordinates and Total Energies

## Compound 1a

Sum of electronic and zero-point Energies: -1450.6636 Hartrees

| Atom | x           | y           | z           |
|------|-------------|-------------|-------------|
| C    | 2.32665300  | -1.89867400 | -0.56699900 |
| C    | 1.17597500  | -1.14131200 | -0.35992900 |
| C    | 1.24547100  | 0.21400200  | -0.07136400 |
| C    | 2.50701500  | 0.81047400  | 0.00087400  |
| C    | 3.66115900  | 0.08226600  | -0.19931500 |
| C    | 3.54821500  | -1.27468100 | -0.48093200 |
| H    | 2.25020600  | -2.95403500 | -0.79183400 |
| H    | 2.57714200  | 1.86919300  | 0.22300700  |
| C    | 0.00006900  | 1.01574200  | 0.20994500  |
| O    | 0.00295500  | -1.82512400 | -0.46522700 |
| C    | -1.24369900 | 0.21137300  | -0.07112800 |
| C    | -1.17147500 | -1.14376800 | -0.35964100 |
| C    | -2.32064300 | -1.90355300 | -0.56636900 |
| C    | -3.54348100 | -1.28208000 | -0.48027700 |
| C    | -3.65914100 | 0.07474000  | -0.19891900 |
| C    | -2.50650100 | 0.80526100  | 0.00115400  |
| O    | -4.68419900 | -2.02987200 | -0.74085200 |
| C    | -0.00148500 | 2.36922100  | -0.46609000 |
| C    | -0.00260700 | 3.35974200  | 0.49299000  |
| C    | -0.00184900 | 2.68298100  | -1.81465900 |
| C    | -0.00422800 | 4.70806000  | 0.16456500  |
| C    | -0.00341900 | 4.02968600  | -2.15828800 |
| H    | -0.00089900 | 1.91126000  | -2.57509700 |
| C    | -0.00462100 | 5.03233400  | -1.18318400 |
| H    | -0.00516600 | 5.46929800  | 0.93449800  |
| H    | -0.00372100 | 4.31081100  | -3.20401600 |
| H    | -0.00585000 | 6.07055100  | -1.48873200 |
| O    | -0.00175100 | 2.71359400  | 1.81933200  |
| C    | -0.00016500 | 1.37097200  | 1.63307100  |
| O    | -0.00218300 | 3.20590200  | 2.91326300  |
| H    | -2.57881700 | 1.86387100  | 0.22309500  |
| H    | -2.24204700 | -2.95876200 | -0.79113100 |
| O    | 4.69097200  | -2.01956800 | -0.74116100 |
| C    | 5.41767400  | -2.43485900 | 0.33204300  |
| C    | -5.41813500 | -2.43557700 | 0.33107900  |
| C    | 6.62559700  | -3.19782800 | -0.10780300 |
| H    | 6.31291300  | -4.06702500 | -0.68652800 |
| H    | 7.23569500  | -2.56772500 | -0.75488500 |
| H    | 7.19489400  | -3.50909500 | 0.76227700  |
| C    | -6.62396000 | -3.20103900 | -0.11020500 |
| H    | -7.23376900 | -2.57188600 | -0.75858800 |
| H    | -6.30948800 | -4.07016900 | -0.68794700 |
| H    | -7.19458500 | -3.51193800 | 0.75913700  |
| O    | 5.09291800  | -2.20156900 | 1.46188800  |
| O    | -5.10062800 | -2.19297000 | 1.46103700  |
| H    | 4.63798800  | 0.54312800  | -0.14054000 |
| H    | -4.63684500 | 0.53373300  | -0.14015100 |

## Compound 1b

Sum of electronic and zero-point Energies: -1648.8009 Hartrees

| Atom | x           | y           | z           |
|------|-------------|-------------|-------------|
| C    | 2.32582900  | -2.02815700 | -0.48252600 |
| C    | 1.17390400  | -1.26359000 | -0.29093500 |
| C    | 1.24419600  | 0.10239000  | -0.05085900 |
| C    | 2.50299000  | 0.71382500  | -0.01661500 |
| C    | 3.63393700  | -0.03800100 | -0.20972700 |
| C    | 3.55522400  | -1.41168800 | -0.43971900 |
| H    | 2.25101600  | -3.09220300 | -0.66596500 |
| H    | 2.60135600  | 1.77920700  | 0.15934800  |
| C    | -0.00002700 | 0.91172000  | 0.22174900  |
| O    | -0.00003900 | -1.95166100 | -0.35785000 |
| C    | -1.24422500 | 0.10241100  | -0.05094300 |
| C    | -1.17395200 | -1.26354500 | -0.29095300 |
| C    | -2.32591000 | -2.02813500 | -0.48252400 |
| C    | -3.55526100 | -1.41164300 | -0.43978300 |
| C    | -3.63396300 | -0.03790700 | -0.20988900 |
| C    | -2.50303600 | 0.71389600  | -0.01677300 |
| O    | -4.69804500 | -2.13972400 | -0.68555700 |
| C    | 0.00003100  | 2.25815100  | -0.47110800 |
| C    | 0.00005800  | 3.25915100  | 0.48128400  |
| C    | 0.00005600  | 2.55784300  | -1.82531800 |
| C    | 0.00013100  | 4.60655700  | 0.13901400  |
| C    | 0.00012100  | 3.90386400  | -2.18162200 |
| O    | 0.00002000  | 1.77811400  | -2.57836500 |
| C    | 0.00016200  | 4.91722800  | -1.21458000 |
| H    | 0.00016200  | 5.37600000  | 0.90167100  |
| H    | 0.00013500  | 4.17515700  | -3.23070300 |

|   |             |             |             |
|---|-------------|-------------|-------------|
| H | 0.00021500  | 5.95307500  | -1.53066000 |
| C | -0.00000500 | 2.62585700  | 1.81626100  |
| O | -0.00008400 | 1.27863900  | 1.63979600  |
| O | -0.00001700 | 3.12513000  | 2.90615500  |
| H | -2.60132900 | 1.77928900  | 0.15915600  |
| H | -2.25104200 | -3.09218900 | -0.66588700 |
| O | 4.69797400  | -2.13979400 | -0.68555900 |
| C | 5.58931200  | -2.28432100 | 0.34655700  |
| C | -5.58934200 | -2.28421100 | 0.34658200  |
| C | 6.79277700  | -3.04428000 | -0.10749800 |
| H | 7.27473600  | -2.50237700 | -0.92238400 |
| H | 7.48076200  | -3.16566800 | 0.72405300  |
| H | 6.48240400  | -4.01758200 | -0.48946900 |
| C | -6.79271700 | -3.04440000 | -0.10730600 |
| H | -7.27458500 | -2.50292800 | -0.92253400 |
| H | -6.48225700 | -4.01789300 | -0.48873100 |
| H | -7.48081500 | -3.16539700 | 0.72420600  |
| O | 5.37480700  | -1.84809900 | 1.43975500  |
| O | -5.37486800 | -1.84781400 | 1.43972000  |
| F | 4.84389100  | 0.53907500  | -0.19556200 |
| F | -4.84393100 | 0.53913600  | -0.19577400 |

## Compound 1c

Sum of electronic and zero-point Energies: -2369.5262 Hartrees

| Atom | x           | y           | z           |
|------|-------------|-------------|-------------|
| C    | 2.32256500  | -2.02597200 | -0.54548700 |
| C    | 1.17172900  | -1.27077200 | -0.33898400 |
| C    | 1.24266000  | 0.08432100  | -0.05283200 |
| C    | 2.50020000  | 0.68507200  | 0.01548500  |
| C    | 3.64506200  | -0.05134800 | -0.18733700 |
| C    | 3.55073500  | -1.41547700 | -0.46688900 |
| H    | 2.24910800  | -3.08221900 | -0.76691600 |
| H    | 2.58236400  | 1.74342100  | 0.23277900  |
| C    | -0.00000700 | 0.89146900  | 0.23063100  |
| O    | -0.00016800 | -1.95406000 | -0.44058800 |
| C    | -1.24276700 | 0.08445700  | -0.05280800 |
| C    | -1.17197900 | -1.27062800 | -0.33901500 |
| C    | -2.32290100 | -2.02568500 | -0.54561200 |
| C    | -3.55099000 | -1.41505600 | -0.46696700 |
| C    | -3.64518700 | -0.05095400 | -0.18723500 |
| C    | -2.50024800 | 0.68533500  | 0.01559900  |
| O    | -4.68443000 | -2.15280700 | -0.72922900 |
| C    | 0.00006000  | 2.24383700  | -0.44788700 |
| C    | 0.00012900  | 3.23380900  | 0.51189500  |
| C    | 0.00005900  | 2.55639200  | -1.79656900 |
| C    | 0.00019900  | 4.58199100  | 0.18335100  |
| C    | 0.00012800  | 3.90327000  | -2.13979100 |
| H    | 0.00000700  | 1.78488400  | -2.55714700 |
| H    | 0.00019800  | 4.90563100  | -1.16456800 |
| C    | 0.00025600  | 5.34328600  | 0.95312500  |
| O    | 0.00012900  | 4.18439700  | -3.18545000 |
| H    | 0.00025100  | 5.94378500  | -1.47021300 |
| C    | 0.00011000  | 2.58810200  | 1.83829000  |
| O    | 0.00002400  | 1.24258200  | 1.65010000  |
| O    | 0.00013600  | 3.07673200  | 2.93239700  |
| H    | -2.58228800 | 1.74367300  | 0.23299600  |
| H    | -2.24954600 | -3.08191900 | -0.76713900 |
| O    | 4.68405200  | -2.15342600 | -0.72905400 |
| C    | 5.45808400  | -2.49783800 | 0.34582900  |
| C    | -5.45800900 | -2.49799900 | 0.34567500  |
| C    | 6.70216300  | -3.19030000 | -0.10227700 |
| H    | 6.44061100  | -4.05184500 | -0.71609300 |
| H    | 7.28554600  | -2.50461000 | -0.71794900 |
| H    | 7.27745300  | -3.49986900 | 0.76436100  |
| C    | -6.70198600 | -3.19069500 | -0.10237600 |
| H    | -7.28485000 | -2.50584800 | -0.71944800 |
| H    | -6.44007100 | -4.05315100 | -0.71479100 |
| H    | -7.27786000 | -3.49911700 | 0.76428100  |
| O    | 5.13335100  | -2.25127500 | 1.47046300  |
| O    | -5.13297100 | -2.25200400 | 1.47035900  |
| Cl   | -5.20604800 | 0.70151500  | -0.10654300 |
| Cl   | 5.20598200  | 0.70104000  | -0.10691000 |

## Compound 1d

Sum of electronic and zero-point Energies: -1493.7907 Hartrees

| Atom | x           | y           | z          |
|------|-------------|-------------|------------|
| C    | 2.33364300  | -1.36552300 | 0.32714500 |
| C    | 1.17123200  | -0.58743600 | 0.38040900 |
| C    | 1.24818000  | 0.79832900  | 0.34228500 |
| C    | 2.49846700  | 1.40869000  | 0.23573100 |
| C    | 3.64715000  | 0.64566300  | 0.18259500 |
| C    | 3.57069400  | -0.74775300 | 0.23997600 |
| H    | 2.56848900  | 2.48938400  | 0.19374400 |
| C    | -0.00001300 | 1.64198400  | 0.46746500 |
| O    | 0.00012500  | -1.26591400 | 0.46356600 |
| C    | -1.24813200 | 0.79821000  | 0.34226800 |

|    |             |             |             |
|----|-------------|-------------|-------------|
| C  | -1.17105200 | -0.58754600 | 0.38042500  |
| C  | -2.33338000 | -1.36575900 | 0.32719100  |
| C  | -3.57049600 | -0.74811700 | 0.24002400  |
| C  | -3.64708700 | 0.64528500  | 0.18256400  |
| C  | -2.49847900 | 1.40843500  | 0.23566900  |
| O  | -4.71428800 | -1.50097600 | 0.25155100  |
| C  | -0.00008500 | 2.83975200  | -0.45825100 |
| C  | -0.00019700 | 3.99518700  | 0.29975400  |
| C  | -0.00004100 | 2.88918600  | -1.84359900 |
| C  | -0.00026800 | 5.25858200  | -0.27964000 |
| C  | -0.00010300 | 4.14915300  | -2.43630500 |
| H  | 0.00003800  | 1.98649500  | -2.44354000 |
| C  | -0.00021300 | 5.32003600  | -1.66705600 |
| H  | -0.00034400 | 6.15249200  | 0.33222600  |
| H  | -0.00005900 | 4.22746700  | -3.51681300 |
| H  | -0.00025700 | 6.28198000  | -2.16429800 |
| C  | -0.00021200 | 3.61189900  | 1.72634000  |
| O  | -0.00005400 | 2.25143400  | 1.79315600  |
| O  | -0.00026200 | 4.29444900  | 2.71056100  |
| H  | -2.56864500 | 2.48911900  | 0.19365900  |
| O  | 4.71460600  | -1.50043900 | 0.25142400  |
| C  | 5.21795600  | -1.89497100 | -0.96752300 |
| C  | -5.21828600 | -1.89459900 | -0.96740600 |
| C  | 6.48828900  | -2.65447000 | -0.78038600 |
| H  | 7.23263800  | -1.98752800 | -0.34110900 |
| H  | 6.32289700  | -3.47852800 | -0.08575900 |
| H  | 6.83599800  | -3.02495900 | -1.74033400 |
| C  | -6.48881100 | -2.65377000 | -0.78021800 |
| H  | -6.32379000 | -3.47762500 | -0.08526600 |
| H  | -7.23304100 | -1.98645200 | -0.34130300 |
| H  | -6.83647900 | -3.02446300 | -1.74010100 |
| O  | 4.66693000  | -1.62444300 | -1.99311900 |
| O  | 4.66761100  | -1.62362200 | -1.99307600 |
| Br | 5.33918300  | 1.46483700  | 0.00573200  |
| Br | -5.33920800 | 1.46430000  | 0.00574000  |
| Br | 2.22085400  | -3.24094500 | 0.35840700  |
| Br | -2.22041600 | -3.24116300 | 0.35839700  |

## Compound 1e

Sum of electronic and zero-point Energies: -1493.7907 Hartrees

| Atom | x           | y           | z           |
|------|-------------|-------------|-------------|
| C    | 2.33083100  | -1.20026100 | -0.12202800 |
| C    | 1.17312800  | -0.43845700 | 0.03640100  |
| C    | 1.24282900  | 0.94531400  | 0.10941900  |
| C    | 2.48369800  | 1.56788200  | 0.00710800  |
| C    | 3.63213300  | 0.82443600  | -0.15637400 |
| C    | 3.55566600  | -0.56438900 | -0.22257400 |
| H    | 2.54117300  | 2.64750200  | 0.06260300  |
| C    | 0.00000200  | 1.75651900  | 0.38119200  |
| O    | -0.00001100 | -1.11934000 | 0.11445400  |
| C    | -1.24283200 | 0.94532500  | 0.10942200  |
| C    | -1.17314400 | -0.43844600 | 0.03639700  |
| C    | -2.33085300 | -1.20023800 | -0.12204500 |
| C    | -3.55583000 | -0.56435500 | -0.22258500 |
| C    | -3.63213900 | 0.82446900  | -0.15636500 |
| O    | -2.48369600 | 1.56790400  | 0.00711900  |
| C    | -4.69131600 | -1.30355800 | -0.44590700 |
| C    | 0.00000700  | 3.10425800  | -0.30233700 |
| C    | 0.00001700  | 4.09643600  | 0.65510300  |
| C    | -0.00000100 | 3.41300600  | -1.65159700 |
| C    | 0.00001900  | 5.44335100  | 0.32306200  |
| C    | 0.00000200  | 4.75911700  | -1.99826300 |
| O    | -0.00001000 | 2.63988900  | -2.41037000 |
| H    | 0.00001200  | 5.76360600  | -1.02575100 |
| H    | 0.00002800  | 6.20647300  | 1.09090400  |
| H    | -0.00000400 | 5.03724900  | -3.04466000 |
| H    | 0.00001400  | 6.80096800  | -1.33396400 |
| C    | 0.00002600  | 3.45603000  | 1.98381300  |
| O    | 0.00000700  | 2.10894600  | 1.80031300  |
| O    | 0.00001800  | 3.94801900  | 3.07570300  |
| H    | -2.54116000 | 2.64752400  | 0.06262300  |
| O    | 4.69129300  | -1.30360500 | -0.44588300 |
| C    | 5.39575200  | -1.70311800 | 0.66213400  |
| C    | -5.39570900 | -1.70319700 | 0.66210800  |
| C    | 6.61808900  | -2.45514400 | 0.25832800  |
| C    | 6.32780800  | -3.31839600 | -0.34119000 |
| H    | 7.24255200  | -1.81017000 | -0.36125100 |
| H    | 7.16015800  | -2.77083700 | 1.14394800  |
| C    | -6.61801700 | -2.45526300 | 0.25828900  |
| H    | -7.24252100 | -1.81030100 | -0.36126000 |
| H    | -6.32769600 | -3.31847900 | -0.34126300 |
| H    | -7.16005700 | -2.77102000 | 1.14390300  |
| O    | 5.02919800  | -1.44786500 | 1.77080100  |
| O    | -5.02912000 | -1.44802100 | 1.77078100  |
| I    | -5.49876100 | 1.78455800  | -0.30859900 |
| I    | -2.22460100 | -3.29513800 | -0.19604600 |
| I    | 2.22456700  | -3.29516200 | -0.19598900 |
| I    | 5.49876400  | 1.78450200  | -0.30864900 |

## Compound 1f

Sum of electronic and zero-point Energies: -6597.4709 Hartrees

| Atom | x           | y           | z           |
|------|-------------|-------------|-------------|
| C    | 2.31800300  | -2.16594800 | -0.36214300 |
| C    | 1.17223800  | -1.40284000 | -0.15036200 |
| C    | 1.24307000  | -0.02657900 | 0.03094800  |
| C    | 2.49658100  | 0.58938000  | -0.02243600 |
| C    | 3.63945700  | -0.15475600 | -0.23962300 |
| C    | 3.54456300  | -1.54010000 | -0.40462500 |
| H    | 2.24324700  | -3.23671800 | -0.50220000 |
| H    | 2.57322000  | 1.66330800  | 0.10403900  |
| C    | -0.00001100 | 0.77509900  | 0.33792800  |
| O    | -0.00011000 | -2.09411600 | -0.14075700 |
| O    | -1.24315400 | -0.02650000 | 0.03096400  |
| C    | -1.17240800 | -1.40274900 | -0.15041500 |
| C    | -2.31821600 | -2.16577100 | -0.36232400 |
| C    | -3.54472800 | -1.53983900 | -0.40477400 |
| C    | -3.63955100 | -0.15451500 | -0.23957300 |
| O    | -2.49663600 | 0.58954000  | -0.02234200 |
| C    | -4.66556900 | -2.29221000 | -0.68010700 |
| C    | 0.00003700  | 2.14918400  | -0.29460400 |
| C    | 0.00009200  | 3.10784200  | 0.70026100  |
| C    | 0.00003800  | 2.50518900  | -1.63459100 |
| C    | 0.00014600  | 4.46866000  | 0.41479200  |
| C    | 0.00009100  | 3.86512300  | -1.93394200 |
| H    | -0.00000400 | 1.75777700  | -2.41964900 |
| C    | 0.00014500  | 4.83614000  | -0.92451700 |
| H    | 0.00019000  | 5.20513500  | 1.20927400  |
| H    | 0.00009200  | 4.18111200  | -2.97034300 |
| H    | 0.00018800  | 5.88468800  | -1.19565500 |
| O    | 0.00008100  | 2.41628500  | 2.00673500  |
| C    | 0.00001400  | 1.07766000  | 1.77108900  |
| O    | 0.00010900  | 2.86688600  | 3.11743400  |
| H    | -2.57320800 | 1.66345800  | 0.10424100  |
| H    | -2.24351100 | -3.23652800 | -0.50250200 |
| O    | 4.66532500  | -2.29263400 | -0.67980500 |
| C    | 5.49186400  | -2.59581200 | 0.37115900  |
| C    | -5.49175400 | -2.59611100 | 0.37094100  |
| C    | 6.71253000  | -3.30721600 | -0.11300400 |
| H    | 6.42376700  | -4.17140600 | -0.71155700 |
| H    | 7.28226100  | -2.63010100 | -0.75235800 |
| H    | 7.31502900  | -3.61436900 | 0.73705500  |
| C    | -6.71241500 | -3.30747700 | -0.11328900 |
| H    | -7.28146200 | -2.63098600 | -0.75388200 |
| H    | -6.42345000 | -4.17247100 | -0.71061800 |
| H    | -7.31555100 | -3.61359300 | 0.73669000  |
| O    | 5.22163300  | -2.30059900 | 1.49905300  |
| O    | -5.22116400 | -2.30161000 | 1.49893100  |
| Br   | 5.32762100  | 0.68766400  | -0.35452700 |
| Br   | -5.32770900 | 0.68794500  | -0.35422200 |

## Compound 2a

Sum of electronic and zero-point Energies: -459.9220 Hartrees

| Atom | x           | y           | z           |
|------|-------------|-------------|-------------|
| C    | -2.84935000 | 0.00037400  | 0.26869200  |
| C    | -2.17942500 | -1.20571600 | 0.07975400  |
| C    | -0.83915200 | -1.21230100 | -0.29451300 |
| C    | -0.18659900 | -0.00047400 | -0.46940300 |
| C    | -0.83877000 | 1.21175600  | -0.29591500 |
| C    | -2.17904000 | 1.20602900  | 0.07838200  |
| H    | -3.89294400 | 0.00071000  | 0.55902500  |
| H    | -2.69878900 | -2.14574400 | 0.22102000  |
| H    | -0.30033900 | -2.13928700 | -0.45146400 |
| H    | -2.69810000 | 2.14638700  | 0.21857800  |
| O    | 1.14049100  | -0.00094200 | -0.89411700 |
| C    | 2.16214000  | -0.00005200 | 0.00511200  |
| C    | 3.28145700  | -0.00038500 | -0.42687200 |
| O    | 1.80537300  | 0.00126900  | 1.46382300  |
| H    | 1.20942700  | 0.88222600  | 1.70790400  |
| H    | 1.20886400  | -0.87888600 | 1.70939600  |
| H    | 2.72490800  | 0.00150000  | 2.04177700  |
| H    | -0.29967700 | 2.13840000  | -0.45393000 |

## Compound 2b

Sum of electronic and zero-point Energies: -559.1725 Hartrees

| Atom | x          | y           | z           |
|------|------------|-------------|-------------|
| C    | 2.92649600 | -0.05439500 | 0.23022700  |
| C    | 2.38964000 | -1.33288900 | 0.11789800  |
| C    | 1.03499100 | -1.50148700 | -0.15707400 |
| C    | 0.22784100 | -0.38894300 | -0.32328700 |
| C    | 0.77641000 | 0.88143200  | -0.21010600 |
| C    | 2.11641300 | 1.06661200  | 0.06606900  |

|   |             |             |             |
|---|-------------|-------------|-------------|
| H | 3.97946200  | 0.07767800  | 0.44463500  |
| H | 3.02224700  | -2.20206700 | 0.24463000  |
| H | 0.59190500  | -2.48553800 | -0.25037200 |
| H | 2.50660500  | 2.07346300  | 0.14625100  |
| F | -0.02903600 | 1.94241200  | -0.38365500 |
| O | -1.10636300 | -0.53956100 | -0.65754400 |
| C | -2.03521600 | -0.18119100 | 0.27746500  |
| O | -1.73125000 | 0.21021200  | 1.36809300  |
| C | -3.41840800 | -0.34846300 | -0.26565100 |
| H | -3.57027000 | 0.37280400  | -1.07064200 |
| H | -3.53337900 | -1.34803500 | -0.68467200 |
| H | -4.14335100 | -0.17927700 | 0.52543500  |

## Compound 2c

Sum of electronic and zero-point Energies: -919.5348 Hartrees

| Atom | x           | y           | z           |
|------|-------------|-------------|-------------|
| C    | 2.96978400  | -0.29655200 | 0.23919800  |
| C    | 2.42213400  | -1.54856000 | -0.02158500 |
| C    | 1.06869000  | -1.66904600 | -0.31762000 |
| C    | 0.27122200  | -0.53608600 | -0.35637200 |
| C    | 0.81942000  | 0.71629100  | -0.09592600 |
| C    | 2.16926000  | 0.84070200  | 0.20284900  |
| H    | 4.02304000  | -0.19804900 | 0.46990600  |
| H    | 3.04559900  | -2.43338700 | 0.00436900  |
| H    | 0.61564100  | -2.63093500 | -0.52480800 |
| H    | 2.58327500  | 1.82129000  | 0.40091100  |
| O    | -1.05991300 | -0.65387300 | -0.71456100 |
| C    | -1.98971100 | -0.56898100 | 0.28204500  |
| O    | -1.68623300 | -0.47896300 | 1.43754700  |
| C    | -3.37205600 | -0.58758800 | -0.28629300 |
| H    | -3.53934300 | 0.35382300  | -0.81421700 |

|    |             |             |             |
|----|-------------|-------------|-------------|
| H  | -3.47181600 | -1.39922500 | -1.00625000 |
| H  | -4.09596600 | -0.69313200 | 0.51679500  |
| Cl | -0.19668900 | 2.12595500  | -0.15931600 |

## Compound 2d

Sum of electronic and zero-point Energies: -3033.5073 Hartrees

| Atom | x           | y           | z           |
|------|-------------|-------------|-------------|
| C    | -3.06256100 | 0.51019200  | 0.23964100  |
| C    | -2.58549100 | 1.78093000  | -0.06567600 |
| C    | -1.24101200 | 1.96519600  | -0.36725800 |
| C    | -0.37982400 | 0.87814600  | -0.36617800 |
| C    | -0.85678400 | -0.39250200 | -0.06024300 |
| C    | -2.19945200 | -0.58059100 | 0.24359400  |
| H    | -4.10890900 | 0.36008500  | 0.47428200  |
| H    | -3.25695400 | 2.63017600  | -0.07004200 |
| H    | -0.84265700 | 2.94294200  | -0.61005300 |
| H    | -2.56206400 | -1.57299000 | 0.47845500  |
| O    | 0.94268300  | 1.06627700  | -0.72726700 |
| C    | 1.86140500  | 1.15920400  | 0.27878000  |
| O    | 1.55109600  | 1.13995000  | 1.43600300  |
| C    | 3.24199200  | 1.27869400  | -0.28166200 |
| H    | 3.47730200  | 0.37052500  | -0.83945200 |
| H    | 3.28490900  | 2.11891500  | -0.97517900 |
| H    | 3.95385000  | 1.41648000  | 0.52712500  |
| Br   | 0.32670400  | -1.87175900 | -0.06802900 |
